# Supplementary material for: Genomic, Transcriptomic and Metabolomic Studies of Two Well-Characterized, Laboratory-Derived Vancomycin-Intermediate Staphylococcus aureus Strains Derived from the Same Parent Strain
Source: MDPI journal article supplement (doi:10.3390/antibiotics4010076), 2015-02-04
Supplement: s1 [file s1]

## Supplementary Material

**Supplementary Table S1.** Two-fold or greater gene expression changes in VISA 13136p<sup>-</sup>m<sup>+</sup>V5 and 13136p<sup>-</sup>m<sup>+</sup>V20 vs. parent VSSA 13136p<sup>-</sup>m<sup>+</sup>.

| Functional Group                                              | Locus ID  | Gene         | Protein                                     | 13136p <sup>-</sup> m <sup>+</sup> V5 | 13136p <sup>-</sup> m <sup>+</sup> V20 |
|---------------------------------------------------------------|-----------|--------------|---------------------------------------------|---------------------------------------|----------------------------------------|
| Amino Acid Biosynthesis                                       | SAV2207   | <i>alsS</i>  | alpha-acetolactate synthase                 | 4                                     | 3.2                                    |
|                                                               | SAV1310   | <i>glnA</i>  | glutamine-ammonia ligase                    | -2.6                                  | -2.1                                   |
|                                                               | SACOL2105 | <i>glyA</i>  | serine hydroxymethyltransferase             | -2.3                                  | -4.2                                   |
|                                                               | SAV2061   | <i>ilvA</i>  | threonine dehydratase                       | -2.5                                  |                                        |
|                                                               | SACOL2045 | <i>ilvC</i>  | ketol-acid reductoisomerase                 | -5.5                                  | -6                                     |
|                                                               | SACOL2042 | <i>ilvD</i>  | dihydroxy-acid dehydratase                  | -2.3                                  | -3.8                                   |
|                                                               | SAV2057   | <i>leuA</i>  | 2-isopropylmalate synthase                  | -3.6                                  | -4                                     |
|                                                               | SAV2059   | <i>leuC</i>  | isopropylmalate isomerase large subunit     |                                       | -3.3                                   |
|                                                               | SAV2158   | <i>mtlA</i>  | PTS system, mannitol specific IIA component | -2.9                                  | -4.5                                   |
|                                                               | SAS2563   | NA           | putative histidinol dehydrogenase           | -2.7                                  | -2.1                                   |
|                                                               | SACOL1773 | <i>serA</i>  | D-3-phosphoglycerate dehydrogenase          | -2.6                                  | -2.6                                   |
|                                                               | SAV0460   | <i>yrhB</i>  | cystathionine gamma-synthase homolog        |                                       | -2.5                                   |
| Biosynthesis of Cofactors,<br>Prosthetic Groups &<br>Carriers | SAV2182   | <i>asp23</i> | alkaline shock protein 23                   | -9.8                                  | -19.7                                  |
|                                                               | SACOL2428 | <i>bioD</i>  | dethiobiotin synthase                       |                                       | 8.7                                    |
|                                                               | SACOL0172 | <i>entB</i>  | Isochorismatase                             | -2.3                                  |                                        |
|                                                               | SAV2346   | <i>fni</i>   | isopentenyl pyrophosphate isomerase         | 2.2                                   | 2.2                                    |
|                                                               | SACOL1719 | <i>hemA</i>  | glutamyl-tRNA reductase                     |                                       | 2.2                                    |
|                                                               | SACOL1715 | <i>hemB</i>  | delta-aminolevulinic acid dehydratase       | 2.2                                   |                                        |

Table S1. Cont.

| Functional Group                                              | Locus ID  | Gene         | Protein                                            | 13136p-m+V5 | 13136p-m+V20 |
|---------------------------------------------------------------|-----------|--------------|----------------------------------------------------|-------------|--------------|
| Biosynthesis of Cofactors,<br>Prosthetic Groups &<br>Carriers | SACOL1889 | <i>hemE</i>  | uroporphyrinogen decarboxylase                     |             | 2.12         |
|                                                               | SACOL1887 | <i>hemG</i>  | protoporphyrinogen oxidase                         |             | 2.4          |
|                                                               | SAV0924   | <i>lipA</i>  | lipoyl synthase                                    | 2.1         |              |
|                                                               | SACOL1049 | <i>menA</i>  | 1,4-dihydroxy-2-naphthoate octaprenyltransferase   | 2.4         |              |
|                                                               | SAV2274   | <i>moaC</i>  | molybdenum cofactor biosynthesis protein C         | 2           | 2.1          |
|                                                               | SACOL0774 | NA           | para-aminobenzoate synthase, component I           | −6.7        | −4.9         |
|                                                               | SAS0284   | NA           | hypothetical protein                               | 2.3         | 6.8          |
|                                                               | SAS0678   | NA           | glutamine amidotransferase class-I protein         | −8.6        | −5.4         |
|                                                               | SAV2472   | NA           | short chain dehydrogenase                          | −8.5        | −5.2         |
|                                                               | SAV2398   | <i>nasF</i>  | uroporphyrin-III C-methyl transferase              | −4.9        | No Data      |
|                                                               | SAV1771   | <i>ribD</i>  | riboflavin specific deaminase                      | −2.1        | −4.3         |
|                                                               | SACOL1764 | <i>thiI</i>  | thiamine biosynthesis protein ThiI                 | 2.6         |              |
| Cell Envelope                                                 | SACOL1062 | <i>atl</i>   | bifunctional autolysin                             |             | −2.4         |
|                                                               | SAV2637   | <i>aur</i>   | zinc metalloproteinase aureolysin                  | 8.2         |              |
|                                                               | SACOL0136 | <i>cap5A</i> | capsular polysaccharide biosynthesis protein Cap5A | −6.7        | −3.9         |
|                                                               | SA0145    | <i>capB</i>  | capsular polysaccharide synthesis enzyme Cap5B     | −5.4        |              |
|                                                               | 23        | <i>capJ</i>  | capsular polysaccharide synthesis enzyme Cap5J     |             | −2.2         |
|                                                               | SAV0159   | <i>capK</i>  | capsular polysaccharide synthesis enzyme Cap5K     |             | −2.8         |

Table S1. Cont.

| Functional Group | Locus ID  | Gene        | Protein                                                | 13136p-m+V5 | 13136p-m+V20 |
|------------------|-----------|-------------|--------------------------------------------------------|-------------|--------------|
| Cell Envelope    | SAV0932   | <i>dltA</i> | D-alanine--D-alanyl carrier protein ligase             | 2.9         |              |
|                  | SACOL0936 | <i>dltB</i> | DltB protein                                           | 3           |              |
|                  | SACOL1872 | <i>epiE</i> | epidermin immunity protein F                           | −6          |              |
|                  | SACOL1871 | <i>epiG</i> | epidermin immunity protein F                           | −11.2       |              |
|                  | SACOL1396 | <i>fmtC</i> | FmtC protein                                           | 2.9         |              |
|                  | SACOL2003 | <i>hlb</i>  | integrated prophage inactivating a beta-hemolysin gene | 3.1         | No Data      |
|                  | SAV2133   | <i>hmrA</i> | HmrA                                                   | −4.3        |              |
|                  | SACOL2689 | <i>icaA</i> | intercellular adhesion protein A                       | 25.2        |              |
|                  | SACOL2692 | <i>icaC</i> | intercellular adhesion protein C                       | 4.6         |              |
|                  | SAV2667   | <i>icaD</i> | intercellular adhesion protein D                       | 15.9        |              |
|                  | SACOL2660 | <i>isaB</i> | immunodominant antigen B                               |             | 3.4          |
|                  | SAV0041   | <i>mecA</i> | penicillin binding protein 2 prime                     | 48.5        |              |
|                  | SAV2099   | <i>murA</i> | UDP-N-acetylglucosamine 1-carboxyvinyltransferase      | −2.3        |              |
|                  | SAV1418   | <i>murG</i> | N-acetylglucosaminyl transferase                       | −2.5        |              |
|                  | SAV2124   | <i>murZ</i> | UDP-N-acetylglucosamine 1-carboxyvinyltransferase      | 2.2         |              |
|                  | SACOL0872 | NA          | OsmC/Ohr family protein                                | −8.5        | −5.7         |
|                  | SACOL1578 | NA          | FtsK/SpoIIIE family protein                            | −2.5        | −7.3         |
|                  | SACOL2578 | NA          | glycosyl transferase, group 2 family protein           | −7.2        | −3.1         |

Table S1. Cont.

| Functional Group | Locus ID  | Gene        | Protein                                                         | 13136p-m+V5 | 13136p-m+V20 |
|------------------|-----------|-------------|-----------------------------------------------------------------|-------------|--------------|
| Cell Envelope    | SAR0392   | NA          | hypothetical protein                                            | −7.4        | −9.7         |
|                  | SAR2053   | NA          | hypothetical protein                                            | −5          | −3           |
|                  | SAS0108   | NA          | putative surface anchored protein                               | −3.6        | 5.6          |
|                  | SAS0236   | NA          | cell wall metabolism protein ScdA                               | −2          | 9.5          |
|                  | SAS0351   | NA          | hypothetical protein                                            | −5.9        | −15.9        |
|                  | SAS2104   | NA          | hypothetical protein                                            | −7.9        | −3.6         |
|                  | SAS2345   | NA          | hypothetical protein                                            | −5.5        | −7.5         |
|                  | SAS2532   | NA          | putative surface anchored protein                               | 4           | 4            |
|                  | SAS2584   | NA          | hypothetical protein                                            | −5.9        | −2.5         |
|                  | SAV0134   | NA          | hypothetical protein                                            | −2.5        | 4.5          |
|                  | SAV0178   | NA          | similar to integral membrane protein LmrP                       | −4.4        | −5           |
|                  | SAV0179   | NA          | similar to surfactin synthetase                                 | −5.8        | −7.1         |
|                  | SAV0726   | NA          | similar to multidrug resistance protein and enterotoxin type C3 | −3.1        | −6.2         |
|                  | SAV1450   | <i>pbp2</i> | penicillin-binding protein 2                                    |             | −2.3         |
|                  | SAV1552   | <i>pbp3</i> | penicillin-binding protein 3                                    | −2.5        |              |
|                  | SAR0136   | <i>sasD</i> | putative surface anchored protein                               | −2.9        | 5.6          |
|                  | SAR2725   | <i>sasF</i> | putative surface anchored protein                               |             | 2.6          |
|                  | SACOL0907 | <i>seb</i>  | staphylococcal enterotoxin B                                    | −17.2       | −18.3        |

Table S1. Cont.

| Functional Group   | Locus ID  | Gene         | Protein                                         | 13136p-m+V5 | 13136p-m+V20 |
|--------------------|-----------|--------------|-------------------------------------------------|-------------|--------------|
| Cell Envelope      | SAV2009   | <i>sec3</i>  | enterotoxin type C3                             | −24.4       | −21.5        |
|                    | SAV0111   | <i>spa</i>   | Immunoglobulin G binding protein A precursor    |             | 11.5         |
|                    | SAV2299   | <i>ssaA</i>  | secretory antigen precursor SsaA homolog        | 4.2         |              |
|                    | SACOL1057 | <i>sspA</i>  | V8 Protease                                     | −4.7        | −3.5         |
|                    | SACOL1970 | <i>sspB2</i> | cysteine protease precursor SspB                | 3.7         |              |
|                    | SAV1046   | <i>sspC</i>  | cysteine protease                               | −3.4        | −8.6         |
| Cellular Processes | SACOL0452 | <i>ahpC</i>  | alkyl hydroperoxide reductase, C subunit        |             | 3.1          |
|                    | SACOL0451 | <i>ahpF</i>  | alkyl hydroperoxide reductase, subunit F        |             | 2.3          |
|                    | SACOL2409 | <i>fmhA</i>  | fmhA protein                                    |             | 2.3          |
|                    | SAV0320   | <i>geh</i>   | glycerol ester hydrolase                        | 2.7         | 12           |
|                    | SACOL2641 | <i>gpxA2</i> | glutathione peroxidase                          | 3.2         |              |
|                    | SACOL0034 | <i>mecR1</i> | methicillin-resistance MecR1 regulatory protein | 38.5        |              |
|                    | SACOL2291 | NA           | staphyloxanthin biosynthesis protein            | 4           | −2.2         |
|                    | SACOL2418 | NA           | IgG-binding protein SBI                         | 2.3         | 5.6          |
|                    | SAS2042   | NA           | putative non-heme iron-containing ferritin      | 2.3         | 6.8          |
|                    | SACOL1010 | <i>relA1</i> | GTP pyrophosphokinase                           | 2.3         |              |
|                    | SAR0135   | <i>sodM</i>  | superoxide dismutase                            |             | 4            |

Table S1. Cont.

| Functional Group                | Locus ID  | Gene         | Protein                                       | 13136p-m+V5 | 13136p-m+V20 |
|---------------------------------|-----------|--------------|-----------------------------------------------|-------------|--------------|
| Central Intermediary Metabolism | SAV0605   | <i>adhI</i>  | alcohol dehydrogenase                         | −7.8        | 4.7          |
|                                 | SACOL2576 | <i>crtN</i>  | dehydrosqualene desaturase                    | −2.1        |              |
|                                 | MW2444    | <i>ddh</i>   | 2-hydroxyacid dehydrogenase                   | −3          |              |
|                                 | SAR2242   | <i>glmS</i>  | D-fructose-6-phosphate aminotransferase       | −2.2        |              |
|                                 | SACOL0032 | <i>maoC</i>  | (R)-specific enoyl-CoA hydratase              | 23.7        |              |
|                                 | SAV0591   | <i>mvaD</i>  | mevalonate diphosphate decarboxylase          | −3.2        | −2.6         |
|                                 | SAV0590   | <i>mvaK1</i> | mevalonate kinase                             | −2.7        | −3.1         |
|                                 | SAV0680   | NA           | similar to lysine decarboxylase family        | −2.6        | −6           |
|                                 | SAV1536   | NA           | glycine dehydrogenase subunit 1               | −2.5        | −3.4         |
|                                 | SAV2033   | NA           | similar to nitroreductase family protein      | −2.2        | 2.7          |
|                                 | SAV2328   | NA           | Dehydrogenase                                 | −9.9        | −4.4         |
|                                 | SAV2580   | NA           | hypothetical protein                          | −4.4        | −2           |
|                                 | SAV2388   | <i>narK</i>  | nitrite extrusion protein                     | −7.6        |              |
|                                 | SAV2627   | <i>phoB</i>  | alkaline phosphatase III precursor            |             | 2.2          |
|                                 | SACOL2282 | <i>ureC</i>  | urease, alpha subunit                         |             | −2.3         |
|                                 | SACOL2284 | <i>ureF</i>  | urease accessory protein UreF                 |             | −2.3         |
| DNA Metabolism                  | SAV0002   | <i>dnaN</i>  | DNA polymerase III subunit beta               | 2.1         |              |
|                                 | SACOL0005 | <i>gyrB</i>  | DNA gyrase, B subunit.                        |             | −2.2         |
|                                 | SACOL0678 | NA           | integrase/recombinase, phage integrase family | −6.5        | −2.3         |
|                                 | SACOL1573 | NA           | integrase/recombinase, core domain family     | −10.6       | −12.1        |

Table S1. Cont.

| Functional Group                     | Locus ID  | Gene         | Protein                                                                     | 13136p-m+V5 | 13136p-m+V20 |
|--------------------------------------|-----------|--------------|-----------------------------------------------------------------------------|-------------|--------------|
| Fatty Acid & PhosphoLipid Metabolism | SACOL2482 | <i>fabG2</i> | 3-oxoacyl-(acyl carrier protein) reductase, point mutation - premature stop | −6.7        | −4.6         |
|                                      | SACOL0987 | <i>fabH</i>  | 3-oxoacyl-(acyl carrier protein)                                            |             | −2.2         |
|                                      | SAV1011   | <i>fabI</i>  | enoyl-(acyl carrier protein) reductase                                      | 2.6         |              |
| Hypothetical Proteins                | MW0035    | NA           | hypothetical protein                                                        | −2.2        | −5.4         |
|                                      | SACOL0067 | NA           | hypothetical protein                                                        | 12.6        | 5            |
|                                      | SACOL0268 | NA           | hypothetical protein                                                        | 2           | 6.6          |
|                                      | SACOL0489 | NA           | hypothetical protein                                                        | 2.2         | 2            |
|                                      | SACOL0490 | NA           | hypothetical protein                                                        | 3           | 3.2          |
|                                      | SACOL0625 | NA           | hypothetical protein                                                        | 11.2        | 2.5          |
|                                      | SACOL0673 | NA           | hypothetical protein                                                        | −3.5        | −2.9         |
|                                      | SACOL0738 | NA           | hypothetical protein                                                        | −3.4        | −2.9         |
|                                      | SACOL0742 | NA           | hypothetical protein                                                        | −3.8        | −2.8         |
|                                      | SACOL0849 | NA           | hypothetical protein                                                        | 4           | 2.6          |
|                                      | SACOL0850 | NA           | hypothetical protein                                                        | 4.9         | 3.7          |
|                                      | SACOL0851 | NA           | hypothetical protein                                                        | 4.2         | 2.2          |
|                                      | SACOL0866 | NA           | hypothetical protein                                                        | −12.9       | −3.8         |
|                                      | SACOL0908 | NA           | hypothetical protein                                                        | −3.8        | −8.8         |
|                                      | SACOL0911 | NA           | hypothetical protein                                                        | 3.8         | −3.9         |
|                                      | SACOL0912 | NA           | hypothetical protein                                                        | −5.4        | −8.3         |

Table S1. Cont.

| Functional Group      | Locus ID  | Gene | Protein              | 13136p-m+V5 | 13136p-m+V20 |
|-----------------------|-----------|------|----------------------|-------------|--------------|
| Hypothetical Proteins | SACOL1041 | NA   | hypothetical protein | −2.6        | −5.9         |
|                       | SACOL1044 | NA   | hypothetical protein | 3.5         | 3.2          |
|                       | SACOL1574 | NA   | hypothetical protein | −5.4        | −8.6         |
|                       | SACOL1679 | NA   | hypothetical protein | −7.3        | −10.3        |
|                       | SACOL1680 | NA   | hypothetical protein | −6.3        | −8.4         |
|                       | SACOL2013 | NA   | hypothetical protein | −2.3        | −2.1         |
|                       | SACOL2174 | NA   | hypothetical protein | −7.4        | −20.2        |
|                       | SACOL2175 | NA   | hypothetical protein | −6.8        | −17.3        |
|                       | SACOL2300 | NA   | hypothetical protein | −3.9        | −2.1         |
|                       | SACOL2379 | NA   | hypothetical protein | −3.5        | −2.8         |
|                       | SACOL2489 | NA   | hypothetical protein | −2.7        | −3.1         |
|                       | SACOL2491 | NA   | hypothetical protein | −4.8        | 5.1          |
|                       | SACOL2547 | NA   | hypothetical protein | −9.5        | 4.2          |
|                       | SACOL2557 | NA   | hypothetical protein | 2.4         | −2           |
|                       | SACOL2595 | NA   | hypothetical protein | −4.8        | −2.6         |
|                       | SACOL2720 | NA   | hypothetical protein | −9.4        | −7           |
|                       | SAR0592   | NA   | hypothetical protein | −12.3       | −15.8        |
|                       | SAR2739   | NA   | hypothetical protein | −3.8        | −2.8         |
|                       | SAS1017   | NA   | hypothetical protein | −4.7        | −2.1         |



Table S1. Cont.

| Functional Group                            | Locus ID  | Gene        | Protein                                                                                         | 13136p-m+V5 | 13136p-m+V20 |
|---------------------------------------------|-----------|-------------|-------------------------------------------------------------------------------------------------|-------------|--------------|
| Hypothetical Proteins                       | SAS1090   | NA          | hypothetical protein                                                                            | 2.1         | 3.6          |
|                                             | SAS1587   | NA          | hypothetical protein                                                                            | 7.3         | 2.3          |
|                                             | SAS2047   | NA          | hypothetical protein                                                                            | −8.1        | −3.9         |
|                                             | SAS2396a  | NA          | hypothetical protein                                                                            | −8.3        | −6.4         |
|                                             | SAS2490   | NA          | hypothetical protein                                                                            | −7.8        | −3           |
|                                             | SAV0278   | NA          | hypothetical protein                                                                            | 2.5         | 2.3          |
|                                             | SAV0280   | NA          | hypothetical protein                                                                            | 2.4         | 2.2          |
|                                             | SAV0716   | NA          | hypothetical protein                                                                            | −2.6        | −3.5         |
|                                             | SAV0769   | NA          | cell-division inhibitor                                                                         | −2.4        | −2.2         |
|                                             | SAV0818   | NA          | hypothetical protein                                                                            | −3.9        | −3.7         |
|                                             | SAV0823   | NA          | hypothetical protein                                                                            | −11.3       | −3.1         |
|                                             | SAV1548   | NA          | hypothetical protein                                                                            | −2.4        | −2.3         |
|                                             | SAV2556   | NA          | hypothetical protein                                                                            | 12.8        | 3.6          |
|                                             | SAV2646   | NA          | hypothetical protein                                                                            | 6.2         | 4.5          |
|                                             | SAV2693   | NA          | hypothetical protein                                                                            | −4.9        | −3.3         |
| Mobile & Extrachromosomal Element Functions | SACOL0134 | NA          | transposase, IS200 family, degenerate - contains one or more premature stops and/or frameshifts |             | 2.4          |
| Protein Fate                                | SAV1254   | <i>clpY</i> | ATP-dependent protease ATP-binding subunit                                                      |             | −2.4         |
|                                             | SACOL1637 | <i>dnaK</i> | dnaK protein                                                                                    |             | −2           |

Table S1. Cont.

| Functional Group  | Locus ID  | Gene        | Protein                                                       | 13136p-m+V5 | 13136p-m+V20 |
|-------------------|-----------|-------------|---------------------------------------------------------------|-------------|--------------|
| Protein Fate      | SAS0824   | NA          | putative cyclophilin type peptidyl-prolyl cis-trans isomerase | 3.1         | 2.2          |
|                   | SAS0983   | NA          | cysteine protease precursor                                   | −3.8        | −3.5         |
|                   | SAV0372   | NA          | predicted PepSY family membrane peptidase propeptide          | −4.1        | −10.5        |
|                   | SAV0753   | <i>secA</i> | translocase                                                   |             | −2.6         |
| Protein Synthesis | SACOL1961 | <i>gatA</i> | glutamyl-tRNA(Gln) amidotransferase, A subunit                |             | −2.6         |
|                   | SACOL0574 | <i>gltX</i> | glutamyl-tRNA synthetase                                      |             | −2.2         |
|                   | SACOL1622 | <i>glyS</i> | glycyl-tRNA synthetase                                        | 2.2         |              |
|                   | SACOL1206 | <i>ileS</i> | isoleucyl-tRNA synthetase                                     | −2.1        | −2.7         |
|                   | SAV0517   | <i>lysS</i> | lysyl-tRNA synthetase                                         | 2.3         |              |
|                   | SACOL1323 | <i>miaA</i> | tRNA delta(2)-isopentenylpyrophosphate transferase            | −2.9        | −2.7         |
|                   | SACOL1803 | NA          | pseudouridine synthase, family 1                              | −3.9        | −2.7         |
|                   | SACOL2239 | <i>rplC</i> | ribosomal protein L3                                          |             | −2.6         |
|                   | SACOL2238 | <i>rplD</i> | 50S ribosomal protein L4                                      |             | −2.7         |
|                   | SACOL2227 | <i>rplE</i> | ribosomal protein L5                                          |             | −2           |
|                   | SAV2218   | <i>rplM</i> | 50S ribosomal protein L13                                     | −2          |              |
|                   | SACOL2229 | <i>rplN</i> | ribosomal protein L14                                         |             | −2.3         |
|                   | SACOL2220 | <i>rplO</i> | ribosomal protein L15                                         |             | −2.1         |
|                   | SACOL2232 | <i>rplP</i> | 50S ribosomal protein L16                                     |             | −2.6         |
|                   | SACOL2223 | <i>rplR</i> | ribosomal protein L18                                         |             | −2.5         |

Table S1. Cont.

| Functional Group                                   | Locus ID  | Gene         | Protein                                                            | 13136p-m+V5 | 13136p-m+V20 |
|----------------------------------------------------|-----------|--------------|--------------------------------------------------------------------|-------------|--------------|
| Protein Synthesis                                  | SACOL2234 | <i>rplV</i>  | ribosomal protein L22                                              |             | −2           |
|                                                    | SACOL2216 | <i>rpmJ</i>  | ribosomal protein L36                                              |             | −2.2         |
|                                                    | SACOL2233 | <i>rpsC</i>  | 30S ribosomal protein S3                                           |             | −2.2         |
|                                                    | SACOL2222 | <i>rpsE</i>  | ribosomal protein S5                                               | −2.2        |              |
|                                                    | SACOL1370 | <i>rpsN1</i> | 30S ribosomal protein S14                                          |             | 2.3          |
|                                                    | SAV2241   | <i>rpsQ</i>  | 30S ribosomal protein S17                                          |             | −3.6         |
|                                                    | SACOL2235 | <i>rpsS</i>  | ribosomal protein S19                                              |             | −3.7         |
|                                                    | SACOL1632 | <i>rpsU</i>  | ribosomal protein S21                                              | −3.3        |              |
|                                                    | SAV0009   | <i>serS</i>  | seryl-tRNA synthetase                                              |             | 2.1          |
|                                                    | SAV1683   | <i>thrS</i>  | threonyl-tRNA synthetase 1                                         | −2.2        |              |
|                                                    | SAV0996   | <i>trpS</i>  | tryptophanyl-tRNA synthetase                                       | 2           |              |
|                                                    | SACOL1778 | <i>tyrS</i>  | tyrosyl-tRNA synthetase                                            | 2.2         | 2.9          |
| Purines, Pyrimidines,<br>Nucleosides & Nucleotides | SACOL2218 | <i>adk</i>   | adenylate kinase                                                   |             | −2.5         |
|                                                    | SACOL1518 | <i>cmk</i>   | cytidylate kinase                                                  | 3.2         |              |
|                                                    | SACOL2130 | <i>deoD2</i> | Purine nucleoside phosphorylase                                    |             | 2.5          |
|                                                    | SAV0390   | <i>guaB</i>  | inositol-monophosphate dehydrogenase                               | −3.5        |              |
|                                                    | SAS1134   | NA           | aspartate carbamoyltransferase catalytic subunit                   | −2.1        | −3           |
|                                                    | SACOL2634 | <i>nrdG</i>  | anaerobic ribonucleoside-triphosphate reductase activating protein | −3.8        | −5.6         |
|                                                    | SAV1841   | <i>prsA</i>  | peptidyl-prolyl <i>cis/trans</i> isomerase                         | 3.4         |              |

Table S1. Cont.

| Functional Group                                   | Locus ID  | Gene         | Protein                                                                                | 13136p-m+V5 | 13136p-m+V20 |
|----------------------------------------------------|-----------|--------------|----------------------------------------------------------------------------------------|-------------|--------------|
| Purines, Pyrimidines,<br>Nucleosides & Nucleotides | SAV0017   | <i>purA</i>  | adenylosuccinate synthase                                                              |             | −2.4         |
|                                                    | SACOL1075 | <i>purC</i>  | phosphoribosylaminoimidazole-succinocarboxamide synthase                               | −5.3        |              |
|                                                    | SAV1074   | <i>purD</i>  | phosphoribosylamine-glycine ligase                                                     | −9.5        | −2.3         |
|                                                    | SAV1070   | <i>purF</i>  | phosphoribosylpyrophosphate amidotransferase                                           | −5.4        | −2.9         |
|                                                    | SACOL1082 | <i>purH</i>  | phosphoribosylaminoimidazolecarboxamide formyltransferase/IMP<br>cyclohydrolase        | −7.2        | −2.9         |
|                                                    | SAV1065   | <i>purK</i>  | phosphoribosylaminoimidazole carboxylase carbon dioxide-fixation chain PurK<br>homolog | −2.5        | −2.2         |
|                                                    | SAV1069   | <i>purL</i>  | phosphoribosylformylglycinamide synthetase                                             | −6.2        | −3.2         |
|                                                    | SAV1071   | <i>purM</i>  | phosphoribosylaminoimidazole synthetase                                                | −8.4        | −2.2         |
|                                                    | SAV1072   | <i>purN</i>  | phosphoribosylglycinamide formyltransferase                                            | −9.5        | −2.5         |
|                                                    | SACOL1077 | <i>purQ</i>  | phosphoribosylformylglycinamide synthase I                                             | −5.3        |              |
|                                                    | SACOL1076 | <i>purS</i>  | phosphoribosylformylglycinamide synthase, PurS protein                                 | −4.8        | −2.8         |
|                                                    | SAV1202   | <i>pyrAA</i> | carbamoyl-phosphate synthase small subunit                                             | −3.5        | −4.5         |
|                                                    | SAV1203   | <i>pyrAB</i> | carbamoyl-phosphate synthase large subunit                                             |             | −2           |
|                                                    | SAV1201   | <i>pyrC</i>  | Dihydroorotase                                                                         | −2.6        |              |
|                                                    | SACOL2606 | <i>pyrD</i>  | dihydroorotate dehydrogenase                                                           |             | −2.1         |
|                                                    | SACOL1217 | <i>pyrE</i>  | orotate phosphoribosyltransferase                                                      |             | −2.2         |
|                                                    | SACOL1216 | <i>pyrF</i>  | orotidine 5'-phosphate decarboxylase                                                   |             | −3.6         |
|                                                    | SACOL2119 | <i>pyrG</i>  | CTP synthetase                                                                         |             | −2           |
|                                                    | SAV1258   | <i>smbA</i>  | uridylate kinase                                                                       | 2.5         |              |

Table S1. Cont.

| Functional Group                                   | Locus ID  | Gene         | Protein                                                           | 13136p-m+V5 | 13136p-m+V20 |
|----------------------------------------------------|-----------|--------------|-------------------------------------------------------------------|-------------|--------------|
| Purines, Pyrimidines,<br>Nucleosides & Nucleotides | SACOL1462 | <i>thyA</i>  | Thymidylate                                                       | −2.9        |              |
|                                                    | SAR1690   | <i>udk</i>   | uridine kinase                                                    | 2.2         |              |
| Regulatory Functions                               | SACOL2026 | <i>agrA</i>  | accessory gene regulator protein A                                | −2.8        | −9           |
|                                                    | SACOL2023 | <i>agrB</i>  | accessory gene regulator protein B                                | −2.8        | −5.7         |
|                                                    | SACOL2025 | <i>agrC2</i> | accessory gene regulator protein C                                | −2.1        | −4.8         |
|                                                    | SACOL2024 | <i>agrD</i>  | accessory gene regulator protein D                                |             | −5.1         |
|                                                    | SACOL1328 | <i>glnR</i>  | glutamine synthetase repressor                                    | −4          |              |
|                                                    | SACOL1324 | <i>hfq</i>   | hfq protein, putative                                             | −2.8        | −2.4         |
|                                                    | SAV2665   | <i>icaR</i>  | <i>ica</i> operon transcriptional regulator                       | −2.4        |              |
|                                                    | SACOL0890 | NA           | transcriptional regulator, Cro/CI family                          | −3.1        | −3.1         |
|                                                    | SACOL2147 | NA           | transcriptional antiterminator, BglG family/DNA-binding protein   | −12         | −4.4         |
|                                                    | SAV0698   | NA           | similar to transcription repressor of fructose operon             | 2.3         | 4.3          |
|                                                    | SAV0786   | NA           | hypothetical protein                                              | −4.7        | −3.8         |
|                                                    | SAV2553   | NA           | hypothetical protein                                              | −2.4        | −2.2         |
|                                                    | SAV0815   | <i>nuc</i>   | staphylococcal nuclease                                           |             | 4.6          |
|                                                    | SAV1693   | <i>phoP</i>  | alkaline phosphatase synthesis transcriptional regulatory protein | −2.4        | 2.6          |
|                                                    | SACOL1210 | <i>pyrR</i>  | pyrimidine regulatory protein PyrR                                | −3          |              |
|                                                    | SAV1764   | <i>rot</i>   | repressor of toxins Rot                                           |             | 12.6         |
|                                                    | SACOL2056 | <i>rsbV</i>  | anti-anti-sigma factor RsbV                                       | −2.9        |              |

Table S1. Cont.

| Functional Group             | Locus ID  | Gene        | Protein                                       | 13136p-m+V5 | 13136p-m+V20 |
|------------------------------|-----------|-------------|-----------------------------------------------|-------------|--------------|
| Regulatory Functions         | SACOL0765 | <i>saeS</i> | sensor histidine kinase                       | 2.1         | −2.6         |
|                              | SACOL0672 | <i>sarA</i> | staphylococcal accessory regulator A          | −2.4        | −2.5         |
|                              | SACOL2287 | <i>sarR</i> | staphylococcal accessory regulator R          | 2           |              |
|                              | SACOL0096 | <i>sarS</i> | staphylococcal accessory regulator S          |             | 8.9          |
|                              | SACOL2258 | <i>sarV</i> | staphylococcal accessory regulator V          | −3.1        |              |
|                              | SAV1835   | <i>traP</i> | signal transduction protein                   |             | 2.1          |
|                              | SACOL1942 | <i>vraR</i> | DNA-binding response regulator VraR           | 2.9         |              |
| Signal Transduction          | SACOL1451 | <i>arlR</i> | DNA-binding response regulator                | −2.5        |              |
|                              | SACOL1450 | <i>arlS</i> | sensor histidine kinase ArlS                  | −2.2        |              |
|                              | SAV1692   | <i>phoR</i> | alkaline phosphatase synthesis sensor protein |             | 2.2          |
| Transcription                | SAV0497   | NA          | translation initiation inhibitor homolog      | −3.2        | −6.8         |
|                              | SAV1274   | <i>pnpA</i> | polyribonucleotide nucleotidyltransferase     | −2.1        | −2.2         |
|                              | SACOL1289 | <i>rbfA</i> | ribosome-binding factor A                     | 2.1         |              |
|                              | SACOL2739 | <i>rnpA</i> | ribonuclease P                                | 2.1         |              |
|                              | SACOL0588 | <i>rpoB</i> | DNA-directed RNA polymerase beta subunit      |             | −3.1         |
|                              | SACOL0589 | <i>rpoC</i> | DNA-directed RNA polymerase beta' subunit     |             | −2.1         |
|                              | SACOL2054 | <i>rpoF</i> | sigma factor B                                | −2.7        |              |
| Transport & Binding Proteins | SAV1696   | <i>aapA</i> | D-serine/D-alanine/glycine transporter        | −2.4        |              |
|                              | SACOL0700 | <i>abcA</i> | ABC transporter, ATP-binding/permease protein | −2.4        | −5.3         |

Table S1. Cont.

| Functional Group             | Locus ID  | Gene         | Protein                                                              | 13136p-m+V5 | 13136p-m+V20 |
|------------------------------|-----------|--------------|----------------------------------------------------------------------|-------------|--------------|
| Transport & Binding Proteins | SACOL1443 | <i>brnQ3</i> | branched-chain amino acid transport system II carrier protein        | 2.5         |              |
|                              | SACOL1319 | <i>glpF</i>  | glycerol uptake facilitator protein                                  |             | −2.1         |
|                              | SAV0948   | <i>mnhE</i>  | Na <sup>+</sup> /H <sup>+</sup> antiporter subunit                   | −3          |              |
|                              | SAR0909   | <i>mnhF</i>  | Na <sup>+</sup> /H <sup>+</sup> antiporter subunit                   | −2.5        |              |
|                              | SAV0946   | <i>mnhG</i>  | Na <sup>+</sup> /H <sup>+</sup> antiporter subunit                   | −2.3        |              |
|                              | SACOL2272 | <i>modA</i>  | molybdenum ABC transporter, molybdenum-binding protein ModA          |             | 3            |
|                              | SA1972    | NA           | hypothetical protein                                                 | 2.7         | 2.1          |
|                              | SACOL0261 | NA           | drug transporter, putative                                           | −2.7        | −3           |
|                              | SACOL0454 | NA           | sodium:dicarboxylate symporter family protein                        | 3           | 3.6          |
|                              | SACOL0630 | NA           | amino acid permease                                                  | −6          | −9.5         |
|                              | SACOL0679 | NA           | Na <sup>+</sup> /H <sup>+</sup> antiporter, MnhA component, putative | −4.1        | −2.5         |
|                              | SACOL0685 | NA           | Na <sup>+</sup> /H <sup>+</sup> antiporter, MnhF component, putative | −3.6        | −3.7         |
|                              | SACOL0689 | NA           | ABC transporter, permease protein                                    | 3.7         | 2.9          |
|                              | SACOL0690 | NA           | ABC transporter, ATP-binding protein                                 | 2.9         | 4.4          |
|                              | SACOL1114 | NA           | Mn <sup>2+</sup> /Fe <sup>2+</sup> transporter, NRAMP family         | −9.5        | −9.4         |
|                              | SACOL1952 | NA           | ferritins family protein                                             | 2.5         | 3.8          |
|                              | SACOL2462 | NA           | ABC transporter, ATP-binding protein                                 | −7.2        | −5.4         |
|                              | SAS0360   | NA           | putative sodium:dicarboxylate symporter protein                      | 3           | 4            |
|                              | SAS0431   | NA           | sugar-specific PTS transport system, IIBC component                  | −4.6        |              |

Table S1. Cont.

| Functional Group             | Locus ID  | Gene         | Protein                                                              | 13136p-m+V5 | 13136p-m+V20 |
|------------------------------|-----------|--------------|----------------------------------------------------------------------|-------------|--------------|
| Transport & Binding Proteins | SAS1805   | NA           | hypothetical protein                                                 | −4.8        | −3.1         |
|                              | SAV0383   | NA           | proton/sodium-glutamate symport protein                              | 3.8         | 4.3          |
|                              | SAV0626   | NA           | Na <sub>+</sub> antiporter                                           | −4.2        | −3           |
|                              | SAV2185   | NA           | glycine betaine transporter opuD homolog                             | −9.2        | −14.5        |
|                              | SAV2301   | NA           | similar to Na <sub>+</sub> antiporter                                | −3.9        | −3.5         |
|                              | SACOL2292 | <i>nhaC</i>  | Na <sup>+</sup> /H <sup>+</sup> antiporter NhaC                      | −3.8        | −3           |
|                              | SACOL2721 | <i>nixA</i>  | high-affinity nickel-transport protein                               |             | −3           |
|                              | SAV0986   | <i>oppB</i>  | oligopeptide transport system permease protein                       | −2.4        |              |
|                              | SACOL0992 | <i>oppC</i>  | oligopeptide ABC transporter, permease protein                       | −3.1        | −2.6         |
|                              | SACOL0994 | <i>oppF</i>  | oligopeptide ABC transporter, ATP-binding protein                    | −3.6        | −2.4         |
|                              | SAV2448   | <i>opuCA</i> | glycine betaine/carnitine/choline ABC transporter                    |             | −2.1         |
|                              | SAR2537   | <i>opuCB</i> | putative glycine betaine/carnitine/choline transport system permease | −2.6        |              |
|                              | SACOL1384 | <i>opuD1</i> | osmoprotectant transporter, BCCT family                              | 2.2         |              |
|                              | SAR2276   | <i>opuD2</i> | glycine betaine transporter 2                                        | −4.9        |              |
|                              | SAV0573   | <i>proP</i>  | proline/betaine transporter homolog                                  | 3.7         | No Data      |
|                              | SAV1199   | <i>pyrP</i>  | uracil permease                                                      | −2.7        |              |
|                              | SACOL0097 | <i>sirC</i>  | iron compound ABC transporter, permease protein SirC                 | −7.1        | −5.6         |
|                              | SAV0474   | <i>treP</i>  | phosphoenolpyruvate-dependent and trehalose-specific PTS enzyme II   | −4.2        | 5.3          |



Table S1. Cont.

| Functional Group | Locus ID | Gene        | Protein                                        | 13136p-m+V5 | 13136p-m+V20 |
|------------------|----------|-------------|------------------------------------------------|-------------|--------------|
| Unclassified     | SAV2633  | <i>arcD</i> | arginine/ornithine antiporter                  | −2.9        |              |
|                  | SA0742   | <i>clfA</i> | fibrinogen-binding protein A, clumping factor  | −2.2        |              |
|                  | SAV1481  | <i>ebpS</i> | elastin binding protein                        | −3.7        |              |
|                  | MW1437   | NA          | hypothetical protein                           | −4.6        | −7.6         |
|                  | SAR2275  | NA          | hypothetical protein                           | −9.8        | −20.4        |
|                  | SAR2386  | NA          | putative dehydrogenase                         | −2.3        | −2.3         |
|                  | SAS0281  | NA          | hypothetical protein                           | 10          | 3.6          |
|                  | SAS1970  | NA          | serine-protein kinase RsbW                     | −2.9        | −2.8         |
|                  | SAS2572  | NA          | hypothetical protein                           | −3.6        | 2.7          |
|                  | SAV0103  | NA          | similar to Blt-like protein                    | 2.3         | 6.6          |
|                  | SAV0277  | NA          | similar to ABC transporter ATP-binding protein | 2.5         | 2            |
|                  | SAV0625  | NA          | MnhD homolog                                   | −2.4        | −2.5         |
|                  | SAV0628  | NA          | hypothetical protein                           | −4.3        | −3.3         |
|                  | SAV0681  | NA          | hypothetical protein                           | −5.7        | −3.9         |
|                  | SAV0717  | NA          | similar to urea amidolyase                     | −4.2        | −3.1         |
|                  | SAV0718  | NA          | hypothetical protein                           | −5          | −3.7         |
|                  | SAV1738  | NA          | hypothetical protein                           | −3.6        | −2.1         |
|                  | SAV1788  | NA          | plant metabolite dehydrogenase homolog         | 2           | 2.1          |
|                  | SAV2135  | NA          | hypothetical protein                           | −3.4        | 2.1          |

Table S1. Cont.

| Functional Group | Locus ID  | Gene         | Protein                                                                             | 13136p-m+V5 | 13136p-m+V20 |
|------------------|-----------|--------------|-------------------------------------------------------------------------------------|-------------|--------------|
| Unclassified     | SAV2366   | NA           | L-lactate permease lctP homolog                                                     | −7.6        | 3.6          |
|                  | SAV2473   | NA           | similar to aminobenzoyl-glutamate transport protein                                 | 2.7         | 3.4          |
|                  | SAV2565   | NA           | hypothetical protein                                                                | −8.2        | −2.3         |
|                  | SAV2687   | NA           | hypothetical protein                                                                | −2.9        | 3.1          |
|                  | SAV1095   | <i>pdhC</i>  | dihydrolipoamide S-acetyltransferase component of pyruvate dehydrogenase complex E2 |             | −3.1         |
| Unknown Function | SACOL1832 | <i>crcB</i>  | crcB protein                                                                        | 3.3         |              |
|                  | SAV1251   | <i>gid</i>   | glucose-inhibited division protein A                                                |             | −3           |
|                  | SACOL1191 | <i>mraZ</i>  | hypothetical protein                                                                | −2.5        |              |
|                  | SACOL0399 | NA           | oxidoreductase, putative                                                            | −4.6        | −4.1         |
|                  | SACOL0671 | NA           | hydrolase, alpha/beta hydrolase fold family                                         | −3.9        | −3.2         |
|                  | SACOL1048 | NA           | acetyltransferase, GNAT family                                                      | 2.6         | 2.2          |
|                  | SACOL1071 | NA           | chitinase-related protein                                                           | 2.9         | 2.1          |
|                  | SACOL2400 | NA           | acetyltransferase, GNAT family                                                      | 2.1         | 2.5          |
|                  | SAS2053   | NA           | haloacid dehalogenase-like hydrolase                                                | 2.4         | 2.1          |
|                  | SAS2467   | NA           | putative hydrolase                                                                  | −7.2        | −6.6         |
|                  | SAV2281   | NA           | hypothetical protein                                                                | 2.3         | 2.1          |
|                  | SAV2458   | NA           | hypothetical protein                                                                | 4.5         | 2.4          |
|                  | SAV2474   | NA           | hypothetical protein                                                                | −5.5        | −10.8        |
|                  | SAV2581   | NA           | conserved hypothetical protein                                                      | −5          | −3.4         |
|                  | SACOL0541 | <i>spoVG</i> | spoVG protein                                                                       | −4.6        | −5.3         |
|                  | SACOL1118 | <i>typA</i>  | GTP-binding protein TypA                                                            |             | −5.1         |
|                  | SACOL1941 | <i>yihY</i>  | predicted membrane protein                                                          | −5.3        | −4.5         |

**Supplemental Table S2.** Expression patterns by gene functional group in VISA 13136p<sup>-</sup>m<sup>+</sup>V5 and 13136p<sup>-</sup>m<sup>+</sup>V20 as number of genes upregulated and downregulated at least two-fold relative to gene expression in VSSA 13136p<sup>-</sup>m<sup>+</sup>. Values in Unchanged columns indicate numbers of genes with less than a two-fold change in expression between parent and VISA. Data in this table were used to generate Figure 1. A total of 338 genes had expression changes at least two-fold in magnitude in at least one VISA versus parent VSSA; for 335 of these expression data were available for both VISA. No expression data were available for three genes for 13136p<sup>-</sup>m<sup>+</sup>V20: two upregulated in 13136p<sup>-</sup>m<sup>+</sup>V5 (Transport and binding proteins, Cell envelope); one downregulated in 13136p<sup>-</sup>m<sup>+</sup>V5 (Biosynthesis of cofactors, prosthetic groups and carriers).

| Gene Functional Group                                     | Genes with Expression Changes | Number of 13136p <sup>-</sup> m <sup>+</sup> V5 Genes |                         |                    | Number of 13136p <sup>-</sup> m <sup>+</sup> V20 Genes |                         |                    |
|-----------------------------------------------------------|-------------------------------|-------------------------------------------------------|-------------------------|--------------------|--------------------------------------------------------|-------------------------|--------------------|
|                                                           |                               | 85 (25%) Upregulated                                  | 188 (56%) Downregulated | 65 (19%) Unchanged | 80 (24%) Upregulated                                   | 177 (52%) Downregulated | 78 (23%) Unchanged |
| Amino acid biosynthesis                                   | 12                            | 1                                                     | 9                       | 2                  | 1                                                      | 10                      | 1                  |
| Biosynthesis of cofactors, prosthetic groups and carriers | 18                            | 7                                                     | 7                       | 4                  | 7                                                      | 5                       | 5                  |
| Cell envelope                                             | 48                            | 13                                                    | 28                      | 7                  | 8                                                      | 21                      | 18                 |
| Cellular processes                                        | 11                            | 7                                                     | 0                       | 4                  | 7                                                      | 1                       | 3                  |
| Central intermediary metabolism                           | 16                            | 1                                                     | 12                      | 3                  | 3                                                      | 8                       | 5                  |
| DNA metabolism                                            | 4                             | 1                                                     | 2                       | 1                  | 0                                                      | 3                       | 1                  |
| Fatty acid and phospholipid metabolism                    | 3                             | 1                                                     | 1                       | 1                  | 0                                                      | 2                       | 1                  |
| Mobile and extrachromosomal element functions             | 1                             | 0                                                     | 0                       | 1                  | 1                                                      | 0                       | 0                  |
| Protein fate                                              | 6                             | 1                                                     | 1                       | 4                  | 1                                                      | 5                       | 0                  |
| Protein synthesis                                         | 27                            | 4                                                     | 7                       | 16                 | 3                                                      | 17                      | 7                  |
| Purines, pyrimidines, nucleosides and nucleotides         | 28                            | 4                                                     | 16                      | 8                  | 1                                                      | 18                      | 9                  |
| Regulatory functions                                      | 24                            | 4                                                     | 15                      | 5                  | 6                                                      | 11                      | 7                  |
| Signal transduction                                       | 3                             | 0                                                     | 3                       | 0                  | 1                                                      | 0                       | 2                  |
| Transcription                                             | 7                             | 2                                                     | 3                       | 2                  | 0                                                      | 4                       | 3                  |
| Transport and binding proteins                            | 39                            | 10                                                    | 25                      | 4                  | 9                                                      | 18                      | 11                 |
| Hypothetical proteins                                     | 50                            | 17                                                    | 33                      | 0                  | 17                                                     | 33                      | 0                  |
| Unclassified                                              | 24                            | 5                                                     | 18                      | 1                  | 9                                                      | 12                      | 3                  |
| Unknown function                                          | 17                            | 7                                                     | 8                       | 2                  | 6                                                      | 9                       | 2                  |

**Supplementary Table S3.** Concordance of gene expression patterns vs. parent VSSA 13136p<sup>-</sup>m<sup>+</sup> between 13136p<sup>-</sup>m<sup>+</sup>V5 and 13136p<sup>-</sup>m<sup>+</sup>V20 for the 335 genes with expression data for both VISA.

|                                                                           |                  |                        |
|---------------------------------------------------------------------------|------------------|------------------------|
| <hr/>                                                                     |                  |                        |
| <u>83 Genes Overexpressed in 13136p<sup>-</sup>m<sup>+</sup>V5</u>        | <u>Genes</u>     | <u>Concordance</u>     |
| Also overexpressed in 13136p <sup>-</sup> m <sup>+</sup> V20              | 44               | 53%                    |
| Underexpressed in 13136p <sup>-</sup> m <sup>+</sup> V20                  | 4                | 5%                     |
| 13136p <sup>-</sup> m <sup>+</sup> V20 expression unchanged               | 35               | 42%                    |
| <br><u>187 Genes Underexpressed in 13136p<sup>-</sup>m<sup>+</sup>V5</u>  | <br><u>Genes</u> | <br><u>Concordance</u> |
| Also underexpressed in 13136p <sup>-</sup> m <sup>+</sup> V20             | 130              | 70%                    |
| Overexpressed in 13136p <sup>-</sup> m <sup>+</sup> V20                   | 14               | 7%                     |
| 13136p <sup>-</sup> m <sup>+</sup> V20 expression unchanged               | 43               | 23%                    |
| <br><u>80 Genes Overexpressed in 13136p<sup>-</sup>m<sup>+</sup>V20</u>   | <br><u>Genes</u> | <br><u>Concordance</u> |
| Also overexpressed in 13136p <sup>-</sup> m <sup>+</sup> V5               | 44               | 55%                    |
| Underexpressed in 13136p <sup>-</sup> m <sup>+</sup> V5                   | 14               | 18%                    |
| 13136p <sup>-</sup> m <sup>+</sup> V5 expression unchanged                | 22               | 28%                    |
| <br><u>177 Genes Underexpressed in 13136p<sup>-</sup>m<sup>+</sup>V20</u> | <br><u>Genes</u> | <br><u>Concordance</u> |
| Also underexpressed in 13136p <sup>-</sup> m <sup>+</sup> V5              | 130              | 73%                    |
| Overexpressed in 13136p <sup>-</sup> m <sup>+</sup> V5                    | 4                | 2%                     |
| 13136p <sup>-</sup> m <sup>+</sup> V5 expression unchanged                | 43               | 24%                    |
| <hr/>                                                                     |                  |                        |

**Supplementary Table S4.** The 45 metabolites with at least one five-fold change among comparisons between 13136p<sup>-</sup>m<sup>+</sup>, 13136p<sup>-</sup>m<sup>+</sup>V5 and 13136p<sup>-</sup>m<sup>+</sup>V20.

| Metabolite Class       | Metabolite                | Metabolite relative concentration<br>per 10 mg dry weight (mean ± SD) |                                       |                                        | Metabolite Relative Concentration Fold-Change |            |          |
|------------------------|---------------------------|-----------------------------------------------------------------------|---------------------------------------|----------------------------------------|-----------------------------------------------|------------|----------|
|                        |                           | VSSA 13136p <sup>-</sup> m <sup>+</sup>                               | 13136p <sup>-</sup> m <sup>+</sup> V5 | 13136p <sup>-</sup> m <sup>+</sup> V20 | VSSA → V5                                     | VSSA → V20 | V5 → V20 |
| Amines &<br>Polyamines | Adenosine-5-monophosphate | ND                                                                    | ND                                    | 5.7 ± 1.2                              |                                               | >100       | >100     |
|                        | Dihydroorotic acid        | ND                                                                    | 3.8 ± 0.7                             | 171.8 ± 27.9                           | >100                                          | >100       | 45.2     |
|                        | Glucosamine               | ND                                                                    | 6.9 ± 1.5                             | 129.4 ± 30.5                           | >100                                          | >100       | 18.8     |
|                        | Guanine                   | 16.2 ± 1.2                                                            | 2.7 ± 0.8                             | 1.7 ± 0.3                              | -5                                            | -10        | -1.6     |
|                        | Guanosine                 | 10.9 ± 2.3                                                            | ND                                    | 42.7 ± 8.6                             | <-100                                         | 3.9        | >100     |
|                        | Hypoxanthine              | ND                                                                    | ND                                    | 0.1 ± 0.0                              |                                               | >10        | >10      |
|                        | Inosine                   | ND                                                                    | ND                                    | 3.3 ± 0.7                              |                                               | >100       | >100     |
|                        | Nicotinic acid            | 4.0 ± 0.9                                                             | 0.5 ± 0.1                             | 9.5 ± 1.5                              | -8                                            | 2.4        | 19       |
|                        | Orotic acid               | 1.7 ± 0.1                                                             | 1.5 ± 0.1                             | 38.7 ± 1.3                             | -1.1                                          | 23         | 25.8     |
|                        | Putrescine                | 63.3 ± 3.7                                                            | 63.5 ± 6.5                            | 11.8 ± 1.8                             |                                               | -5.4       | -5.4     |
|                        | Spermidine                | 42.1 ± 5.7                                                            | 4.5 ± 0.5                             | 3.7 ± 0.6                              | -9.4                                          | -11.4      | -1.2     |
|                        | Uracil                    | 23.7 ± 2.1                                                            | 4.4 ± 0.7                             | 6.5 ± 0.8                              | -5.4                                          | -3.6       | 1.5      |
|                        | Uridine                   | 9.3 ± 1.0                                                             | 57.6 ± 7.4                            | 13.2 ± 0.9                             | 6.2                                           | 1.4        | -4.4     |
| Amino Acids            | Cystathionine             | 4.5 ± 0.8                                                             | ND                                    | ND                                     | <-100                                         | <-100      |          |
|                        | Glutamic acid             | 20.5 ± 4.0                                                            | 284.7 ± 76.8                          | 308.5 ± 36.4                           | 14                                            | 15         | 1.1      |
|                        | Homoserine                | 1.0 ± 0.2                                                             | ND                                    | 0.6 ± 0.1                              | <5                                            | -1.7       | >100     |
|                        | N-Acetylglutamic acid     | ND                                                                    | ND                                    | 25.6 ± 1.5                             |                                               | >100       | >100     |
|                        | O-Acetyl-serine           | 5.4 ± 1.3                                                             | 1.0 ± 0.2                             | ND                                     | -5.4                                          | <-100      | <-100    |
|                        | Ornithine                 | 30.8 ± 4.8                                                            | 16.6 ± 3.1                            | 1.2 ± 0.2                              | -2                                            | -26        | -13.8    |
|                        | Proline                   | 10.9 ± 1.5                                                            | 154.6 ± 30.0                          | 239.8 ± 8.0                            | 14                                            | 22         | 1.6      |
|                        | Threonine                 | 52.8 ± 10.6                                                           | 20.0 ± 8.5                            | 7.8 ± 1.2                              | -2.6                                          | -6.8       | -2.6     |

Table S4. Cont.

| Metabolite Class    | Metabolite         | Metabolite relative concentration<br>per 10 mg dry weight (mean $\pm$ SD) |                                       |                                        | Metabolite Relative Concentration Fold-Change |                        |                      |
|---------------------|--------------------|---------------------------------------------------------------------------|---------------------------------------|----------------------------------------|-----------------------------------------------|------------------------|----------------------|
|                     |                    | VSSA 13136p <sup>-</sup> m <sup>+</sup>                                   | 13136p <sup>-</sup> m <sup>+</sup> V5 | 13136p <sup>-</sup> m <sup>+</sup> V20 | VSSA $\rightarrow$ V5                         | VSSA $\rightarrow$ V20 | V5 $\rightarrow$ V20 |
| Polar Organic Acids | 2-Phosphoglycerate | 14.6 $\pm$ 2.0                                                            | 7.5 $\pm$ 1.9                         | 3.0 $\pm$ 0.6                          | -2                                            | -5                     | -2.5                 |
|                     | 3-Phosphoglycerate | 242.6 $\pm$ 45.1                                                          | 62.7 $\pm$ 10.9                       | 40.1 $\pm$ 7.5                         | -3.9                                          | -6                     | -1.6                 |
|                     | cis-Aconitic acid  | ND                                                                        | 2.1 $\pm$ 0.2                         | ND                                     | > 100                                         |                        | <-100                |
|                     | Citric acid        | 15.6 $\pm$ 2.0                                                            | 243.7 $\pm$ 22.6                      | 35.1 $\pm$ 8.4                         | 16                                            | 2.3                    | -6.9                 |
|                     | Fumaric acid       | 19.8 $\pm$ 4.5                                                            | 1.5 $\pm$ 0.4                         | 28.6 $\pm$ 4.0                         | -12.5                                         | 1.4                    | 19.1                 |
|                     | Gluconic acid      | 0.6 $\pm$ 0.1                                                             | 11.8 $\pm$ 2.2                        | 5.8 $\pm$ 2.1                          | 20                                            | 10                     | -2                   |
|                     | Malic acid         | 3.4 $\pm$ 0.6                                                             | ND                                    | 12.9 $\pm$ 2.3                         | <-100                                         | 3.7                    | >100                 |
|                     | Pantothenate       | ND                                                                        | ND                                    | 2.2 $\pm$ 0.0                          |                                               | >100                   | >100                 |
|                     | Phenylpyruvic acid | ND                                                                        | ND                                    | 3.4 $\pm$ 0.4                          |                                               | >100                   | >100                 |
| Sugars              | Fructose           | 40.5 $\pm$ 7.5                                                            | 4.0 $\pm$ 0.8                         | 1.8 $\pm$ 0.2                          | -10                                           | -23                    | -2.2                 |
|                     | Galactitol         | ND                                                                        | 2.1 $\pm$ 0.2                         | 2.0 $\pm$ 0.3                          | >100                                          | >100                   | -1.1                 |
|                     | Galactose          | 5.1 $\pm$ 1.3                                                             | 7.9 $\pm$ 0.8                         | 1.5 $\pm$ 0.3                          | 1.5                                           | -3.3                   | -5.3                 |
|                     | Glucose-1-P        | 20.3 $\pm$ 5.2                                                            | 13.8 $\pm$ 3.4                        | 2.3 $\pm$ 0.6                          | -1.4                                          | -10                    | -6                   |
|                     | Glucose-6-P        | 13.6 $\pm$ 0.7                                                            | 1.6 $\pm$ 0.3                         | 0.5 $\pm$ 0.1                          | -8.5                                          | -27.2                  | -3.2                 |
|                     | Inositol           | 3.1 $\pm$ 1.0                                                             | 12.8 $\pm$ 1.1                        | 0.1 $\pm$ 0.0                          | 4.1                                           | -31                    | -128                 |
|                     | Mannitol           | 178.1 $\pm$ 15.6                                                          | 29.5 $\pm$ 7.2                        | 32.3 $\pm$ 3.1                         | -6                                            | -5.5                   | 1.1                  |
|                     | Mannose            | 7.2 $\pm$ 1.0                                                             | 12.8 $\pm$ 2.4                        | 1.2 $\pm$ 0.2                          | 1.8                                           | -6                     | -10.7                |
|                     | Mannose-6-P        | 13.2 $\pm$ 2.9                                                            | ND                                    | ND                                     | <-100                                         | <-100                  |                      |
|                     | Ribitol            | 122.9 $\pm$ 22.0                                                          | 24.2 $\pm$ 4.4                        | 76.2 $\pm$ 15.4                        | -5                                            | -1.6                   | 3.1                  |
|                     | Ribose-5-P         | 4.3 $\pm$ 0.5                                                             | 30.6 $\pm$ 1.8                        | 12.5 $\pm$ 2.0                         | 7.2                                           | 2.9                    | -2.4                 |
|                     | Sedoheptulose      | 2.3 $\pm$ 0.7                                                             | 2.2 $\pm$ 0.0                         | ND                                     |                                               | <-100                  | <-100                |
|                     | Sedoheptulose-7-P  | 1.0 $\pm$ 0.0                                                             | ND                                    | ND                                     | <-100                                         | <-100                  |                      |
|                     | Sucrose            | 14.5 $\pm$ 2.5                                                            | 1.4 $\pm$ 0.7                         | 6.4 $\pm$ 0.2                          | -10                                           | -2.3                   | 4.6                  |
|                     | Trehalose          | 2.5 $\pm$ 0.3                                                             | 17.6 $\pm$ 0.7                        | 3.4 $\pm$ 0.8                          | 7                                             | 1.4                    | -5.2                 |

Empty cells: no changes (one-fold changes); ND: Not Detected, with values of 0.01 used for < and > fold-change estimates. Green cells: at least five-fold increase in metabolite concentration; red cells: at least a five-fold decrease in metabolite concentration. Metabolites within each class sorted alphabetically.

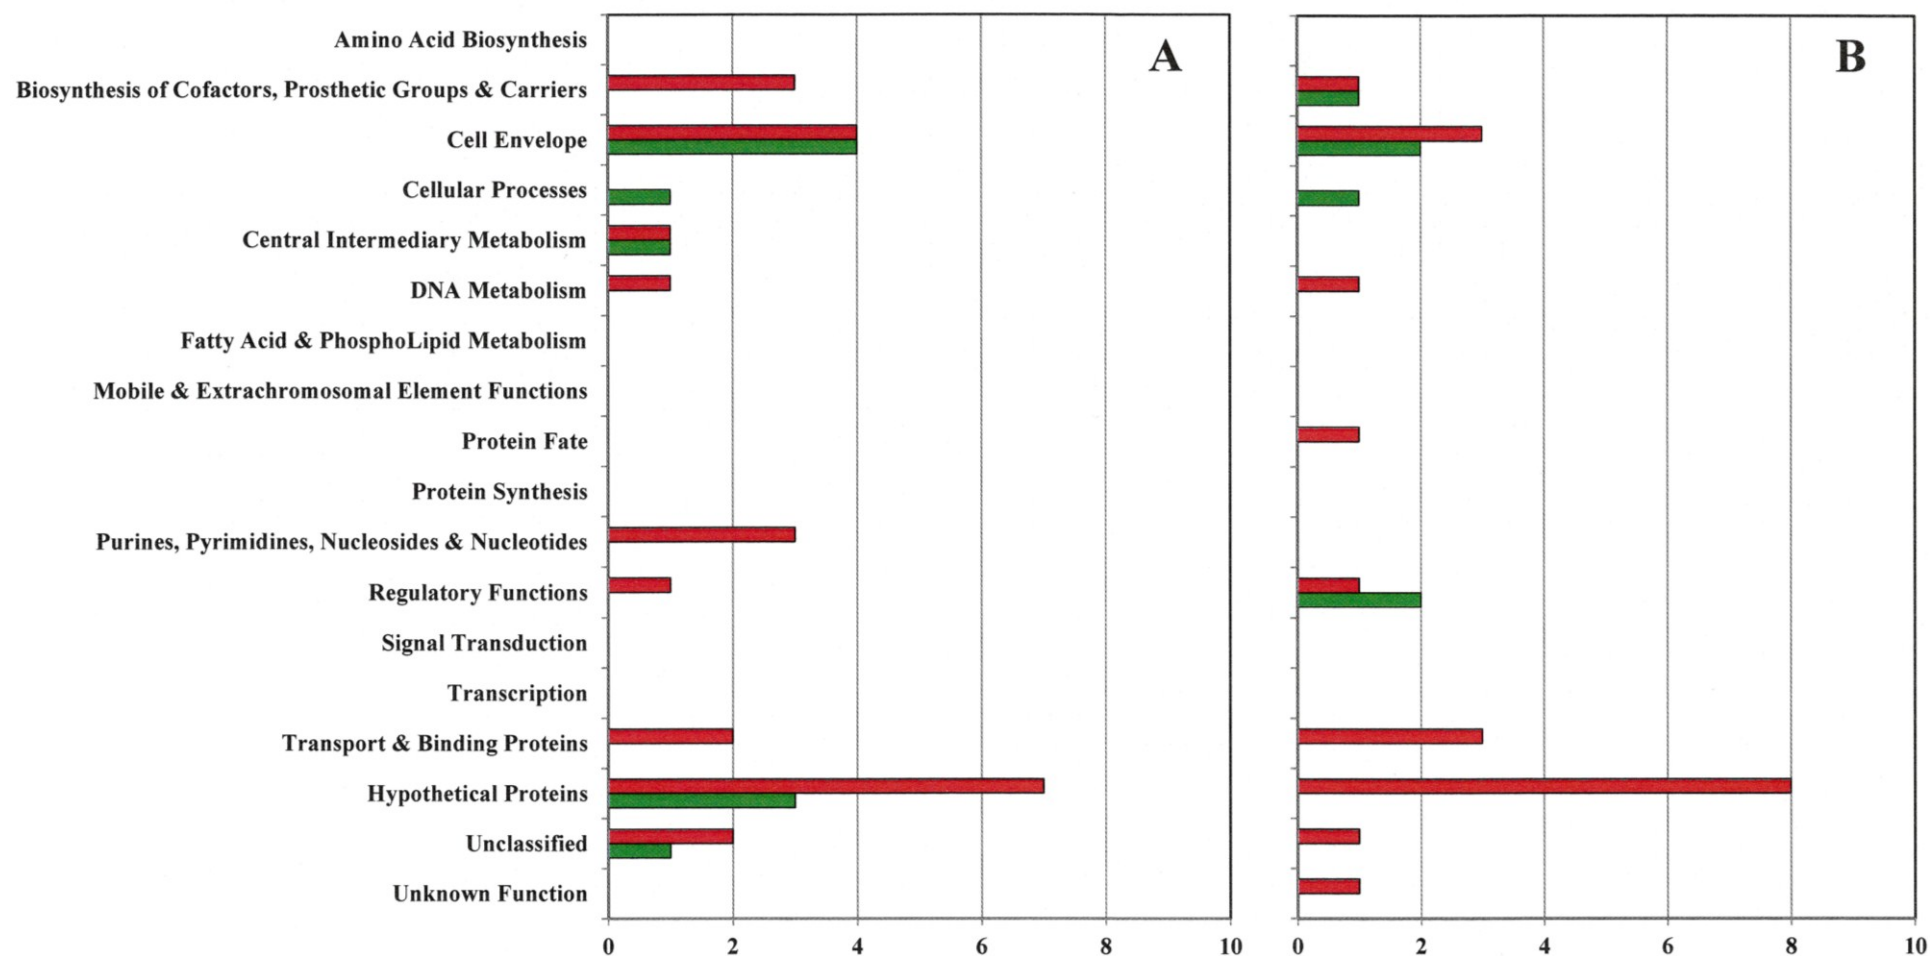

**Supplementary Figure S1.** Number of genes by functional group upregulated (green bars) and downregulated (red bars) at least eight-fold in VISA 13136p<sup>-</sup>m<sup>+</sup>V5 (A) and 13136p<sup>-</sup>m<sup>+</sup>V20 (B) relative to gene expression in VSSA parent 13136p<sup>-</sup>m<sup>+</sup>.

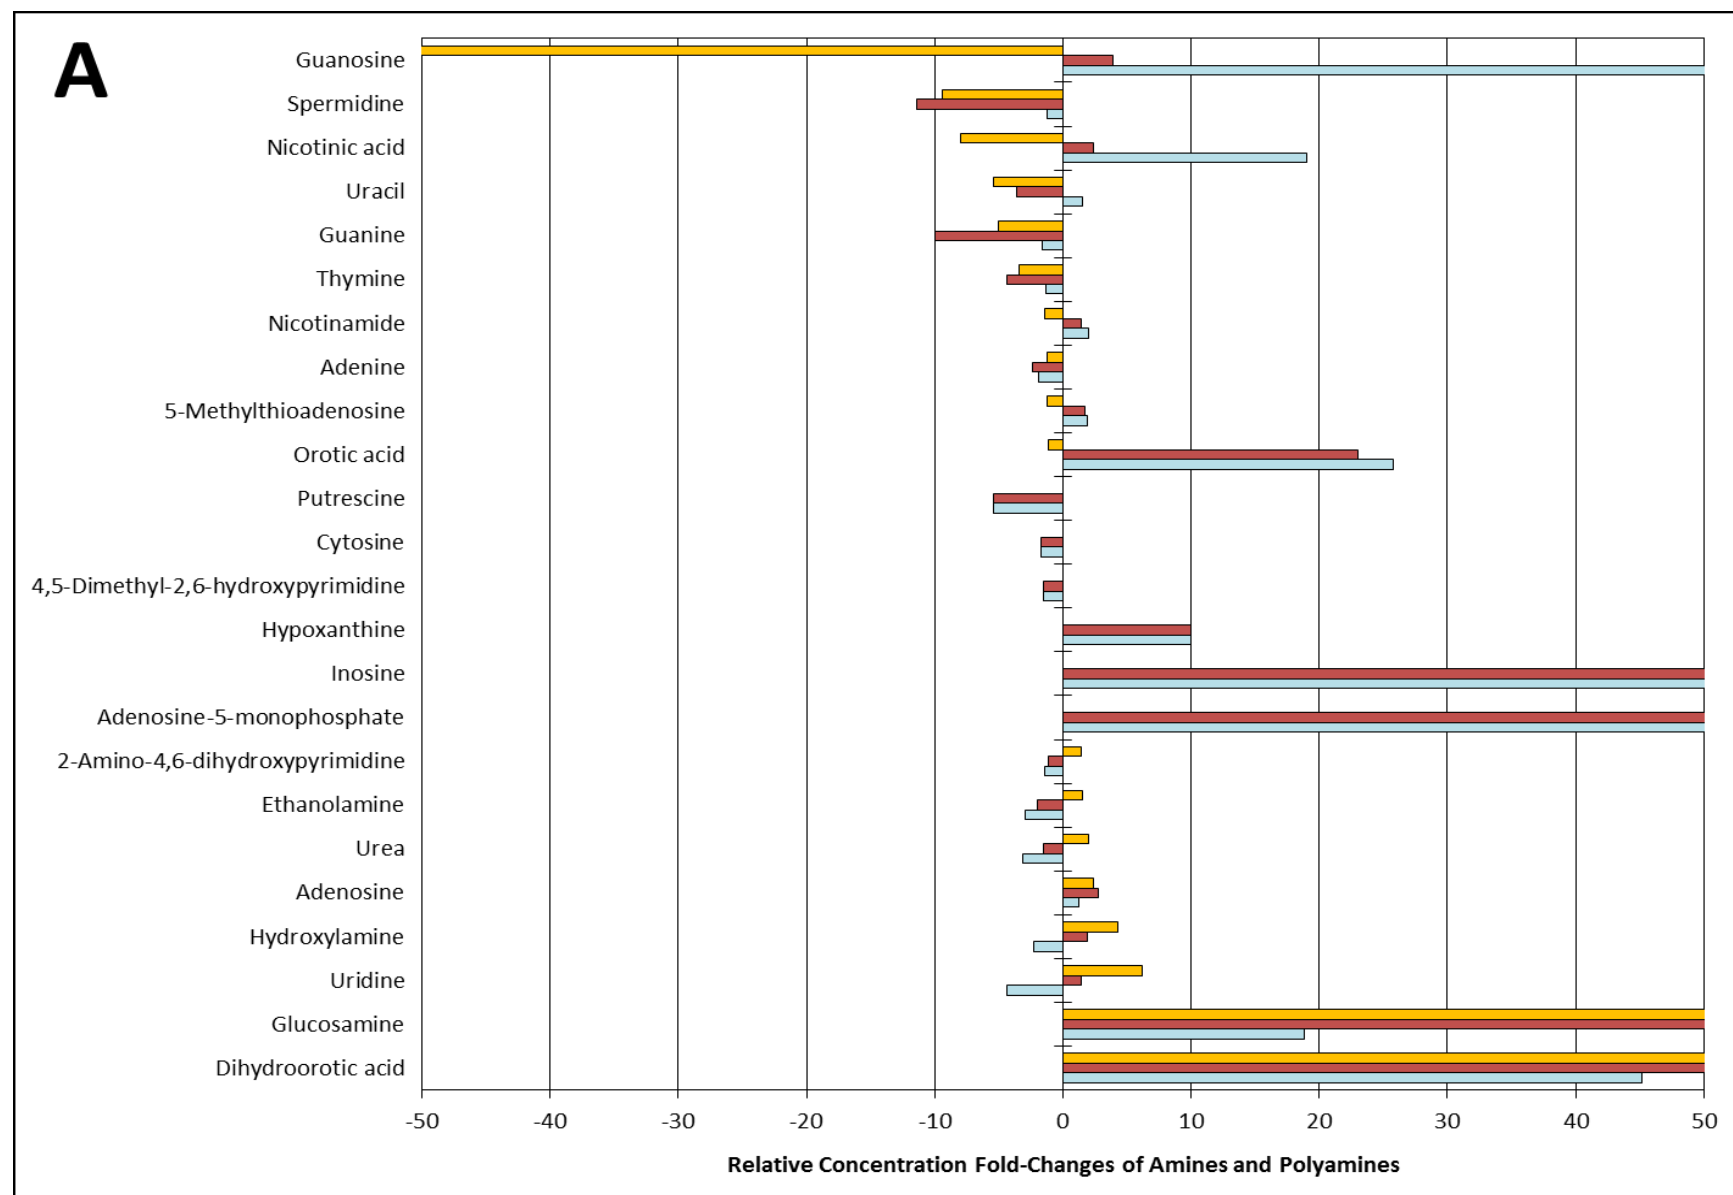Supplementary Figure S2. *Cont.*



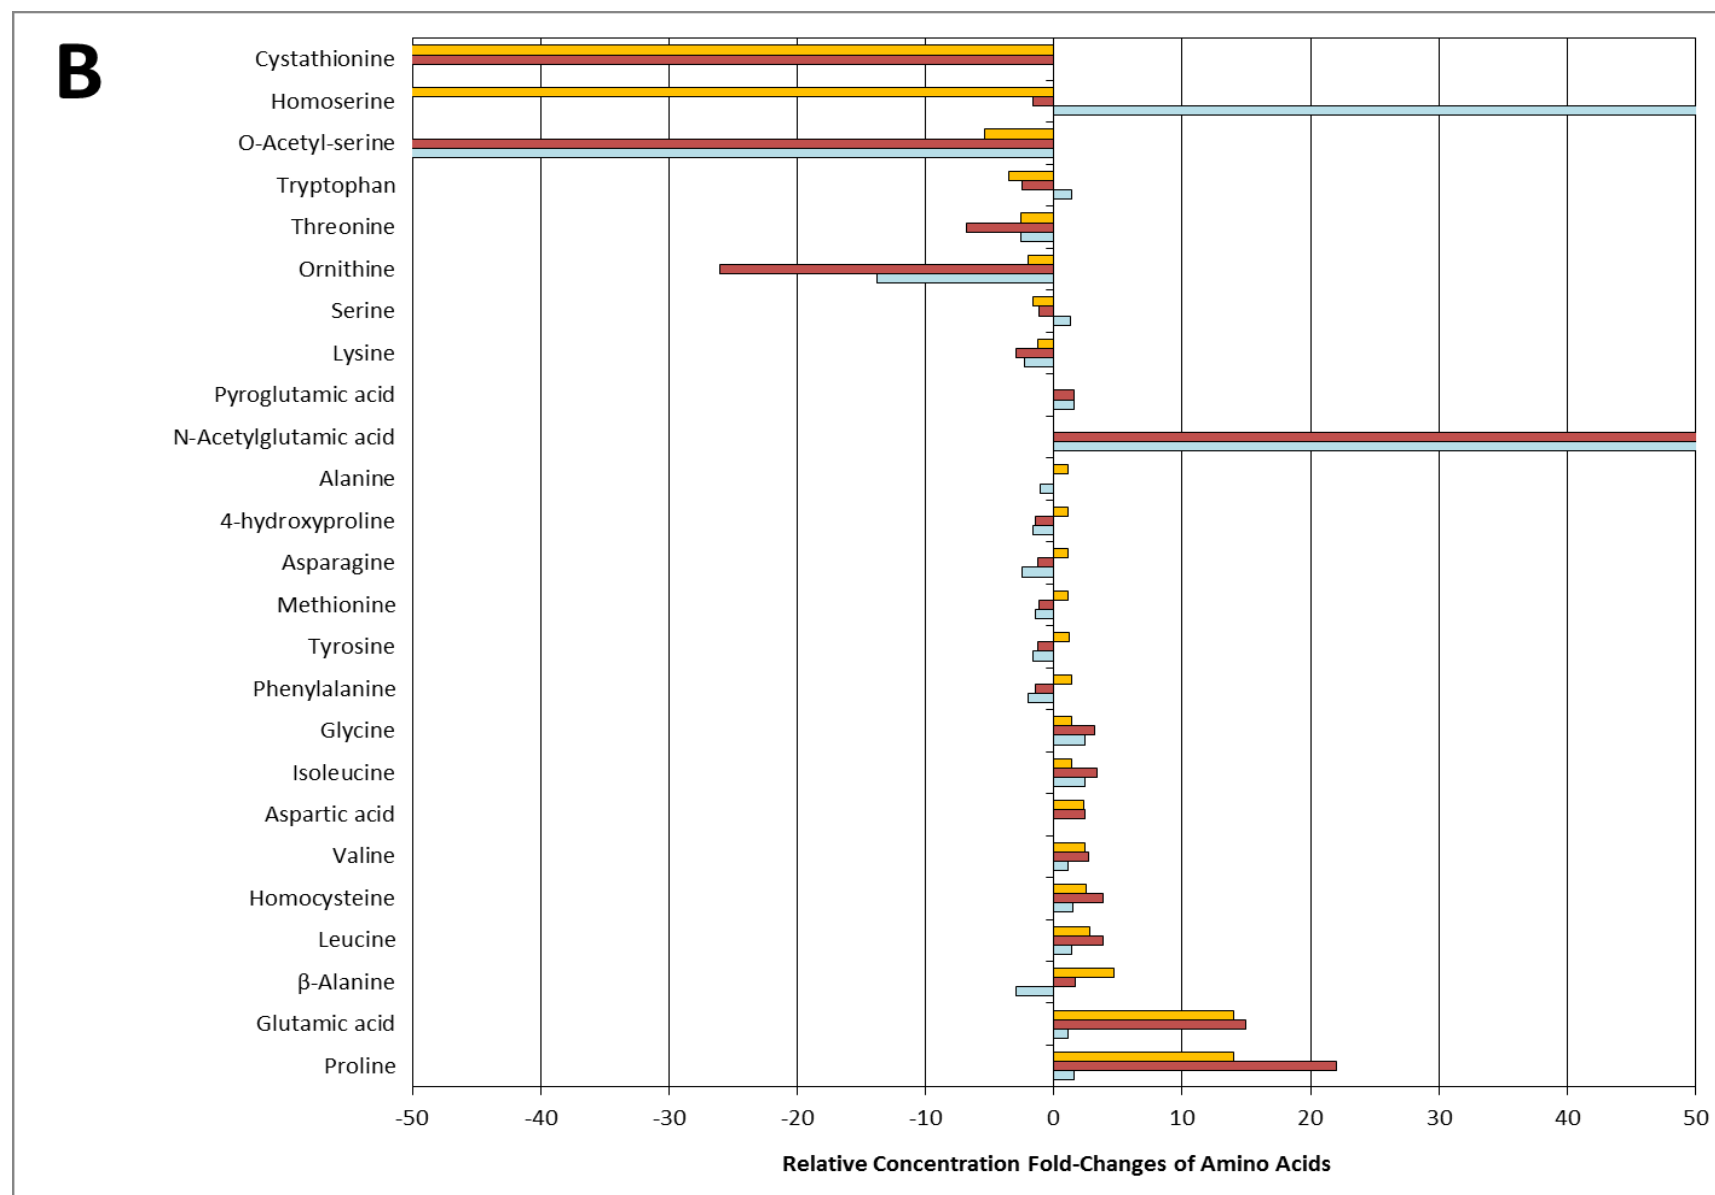

Supplementary Figure S2. Cont.

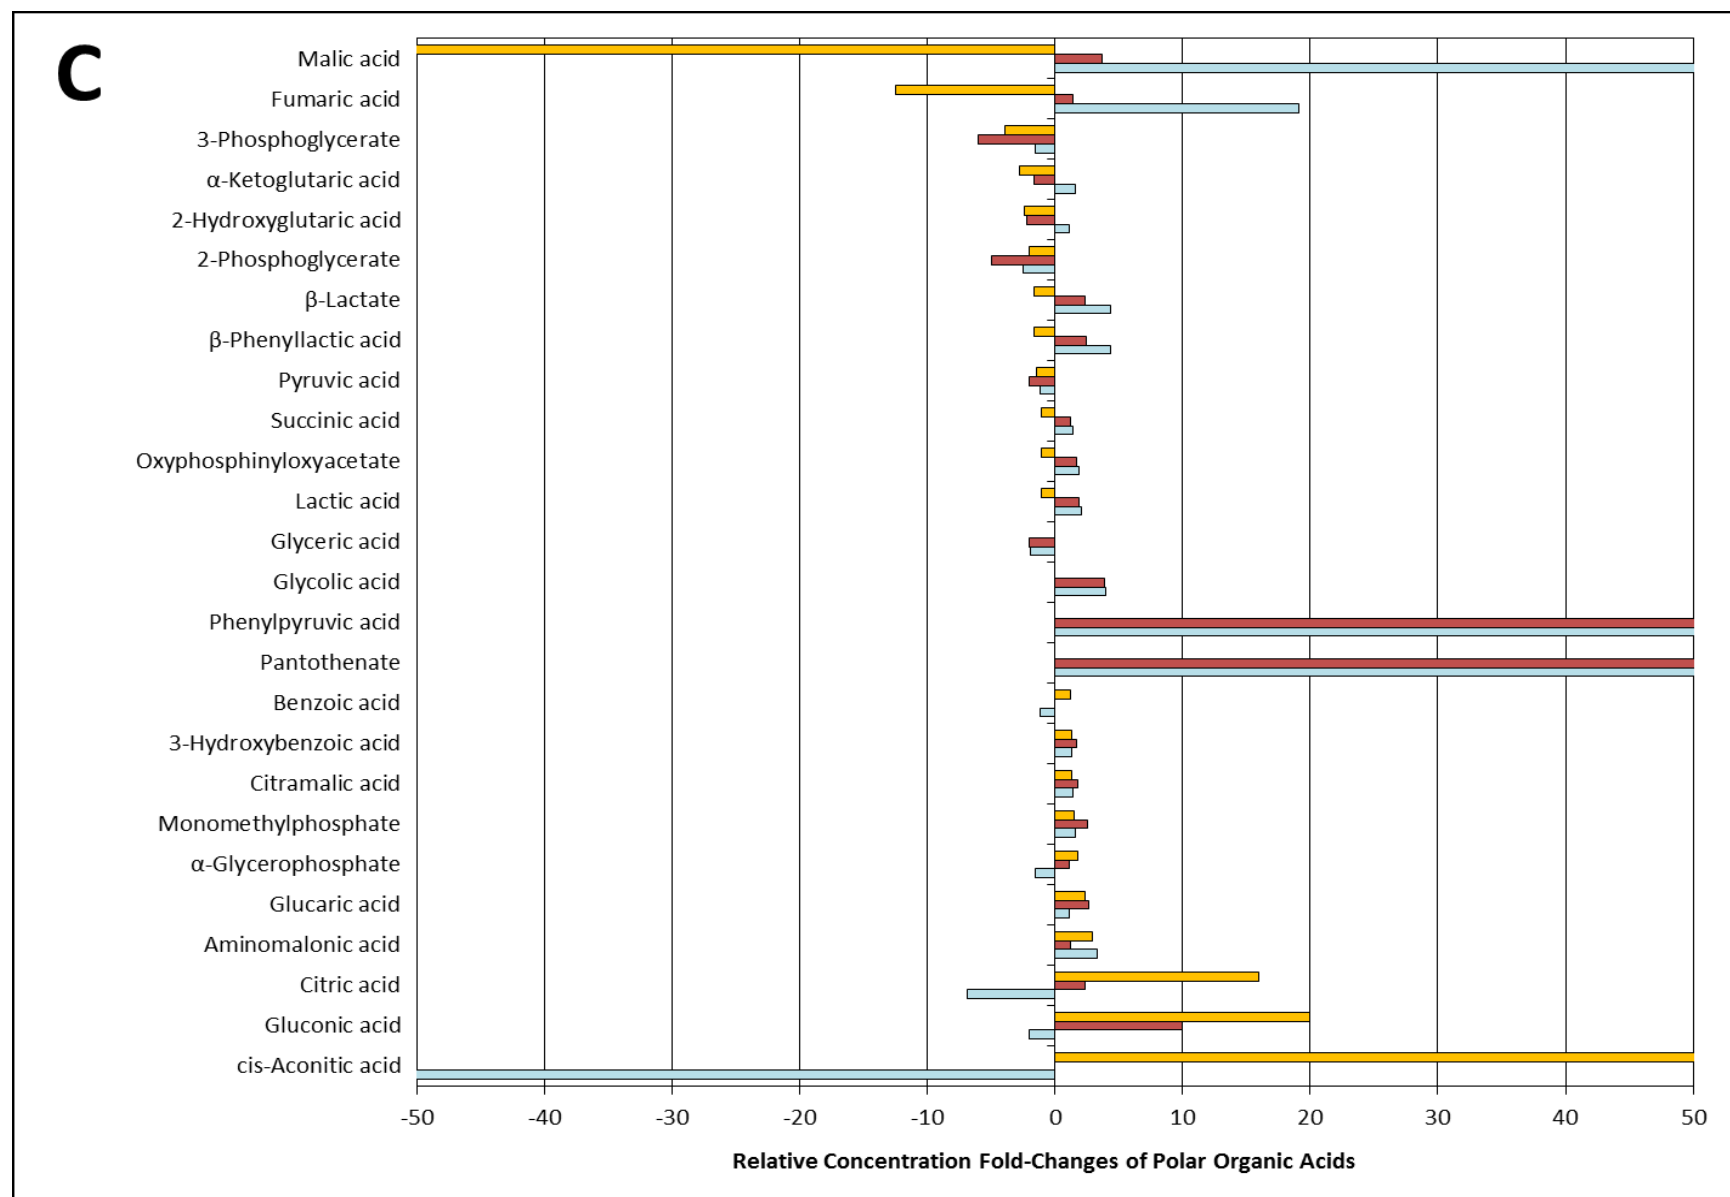Supplementary Figure S2. *Cont.*

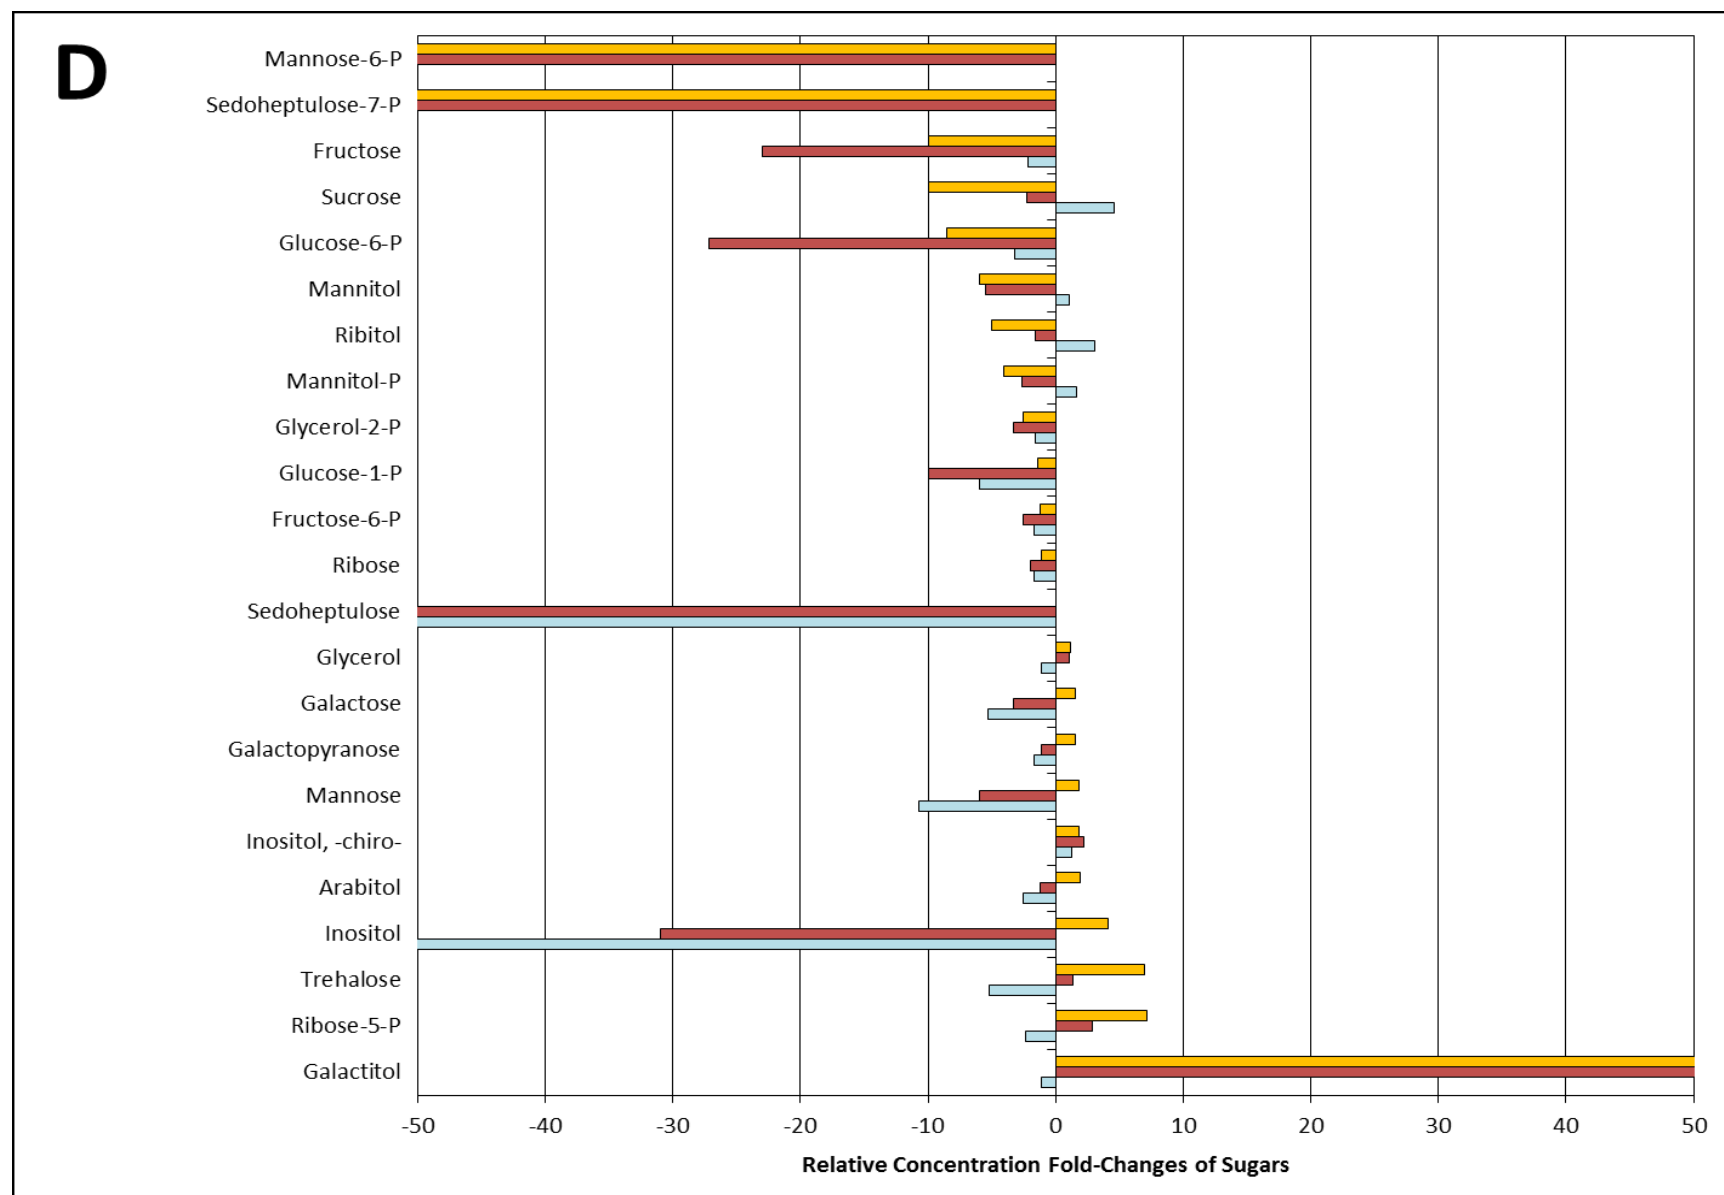Supplementary Figure S2. *Cont.*

**Supplementary Figure S2.** Metabolomic profiles by metabolite class (A–D). Gold bars: metabolite relative concentration changes in VISA 13136p<sup>−</sup>m<sup>+</sup>V5 vs. VSSA 13136 p<sup>−</sup>m<sup>+</sup>. Dark red bars: metabolite relative concentration changes in VISA 13136p<sup>−</sup>m<sup>+</sup>V20 vs. VSSA 13136 p<sup>−</sup>m<sup>+</sup>. Light blue bars: metabolite relative concentration changes in VISA 13136p<sup>−</sup>m<sup>+</sup>V20 vs. VISA 13136 p<sup>−</sup>m<sup>+</sup>V5. Metabolites in each class listed from largest decrease to largest increase in relative concentration fold-change for VISA 13136p<sup>−</sup>m<sup>+</sup>V5 vs. VSSA 13136 p<sup>−</sup>m<sup>+</sup>. All bars extending to x-axis boundaries represent < 100- or > 100-fold changes except inositol in Fig. 2D, for which the relative concentration in VISA 13136p<sup>−</sup>m<sup>+</sup>V20 was 128-fold lower than that in VISA 13136p<sup>−</sup>m<sup>+</sup>V5.

### Supplementary File S1. Metabolomic analysis background information.

The instrument variability was 5%, which is within the standard acceptance limit. Chemometric models were obtained using internal standard-normalized, centered and scaled to Pareto variance data. Obtained metabolite concentrations were analyzed with SIMCA P+ (12.0) software and Metaboanalyst 2.0 (<http://www.metaboanalyst.ca>) [1]. Missing values were imputed with the ½ of observed minimum positive detection value, assuming their level was below the instrument detection limit. All spurious metabolites derived from column bleed and reagent artifacts were also removed from the data sets.

GC/MS analysis of polar metabolites detected a total of ~1850 EI mass spectral features per sample. Of these, 98 compounds were positively identified as amines and polyamines (24% of total identified compounds), amino acids (26%), carbohydrates (23%) and organic acids (27%).

To analyze the overall levels of identified metabolites within and between strains, box plot analysis of metabolite levels was performed. All samples showed acceptable ranges of metabolite levels and degree of variation within each subgroup (Figure 1).

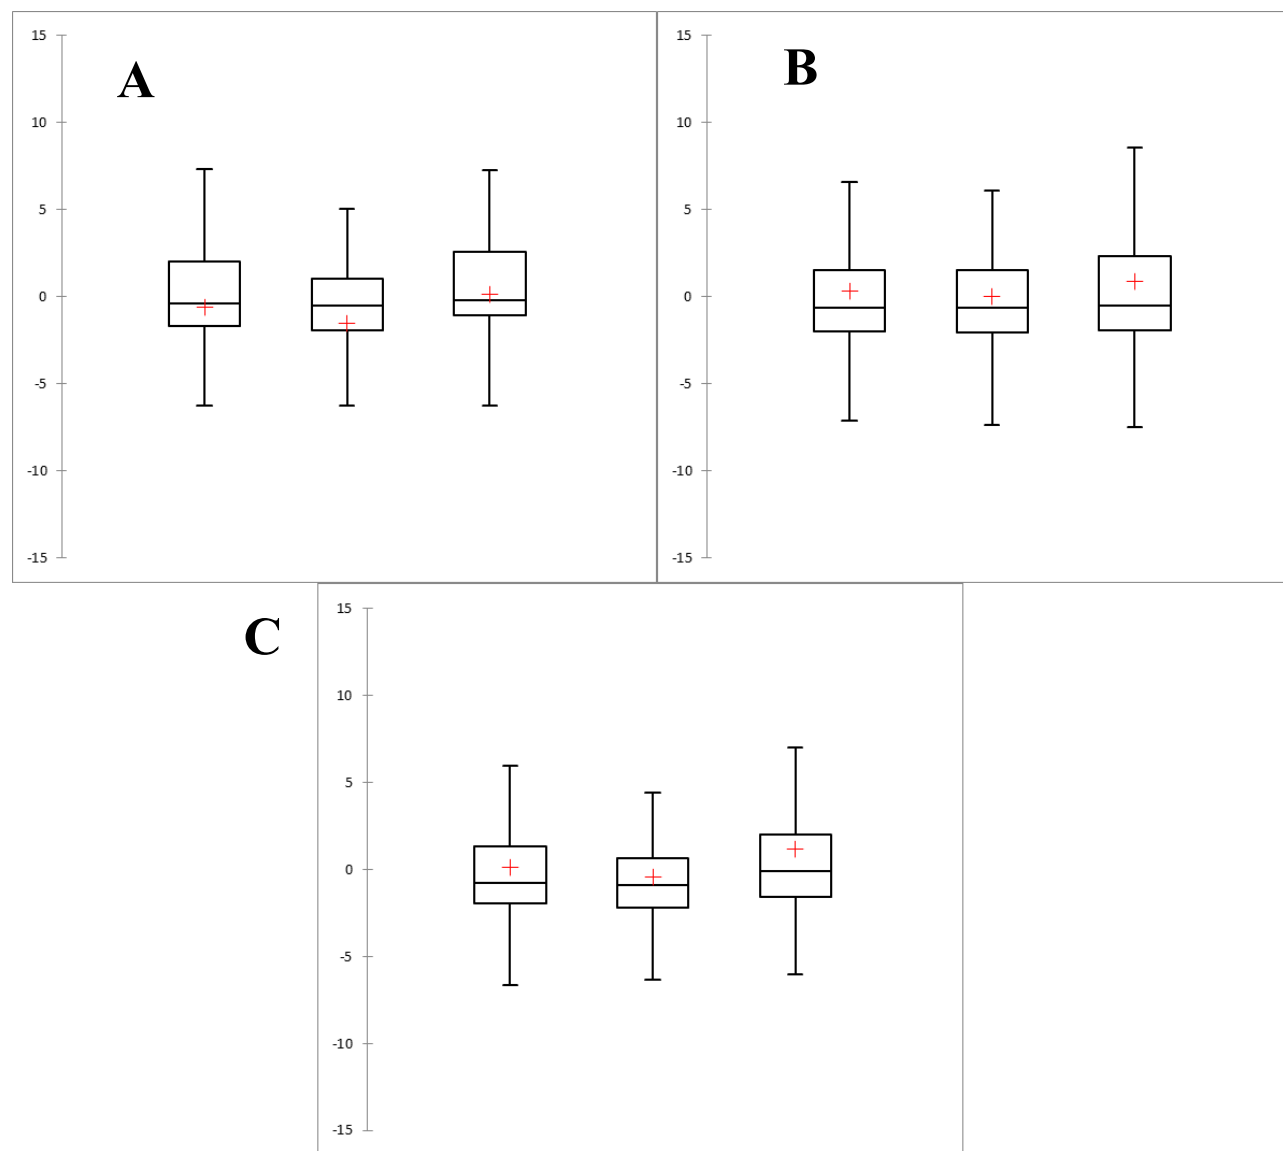

**Figure 1.** Box plot analysis of metabolite levels within each strain: **A** –  $13136p^-m^+$ , **B** –  $13136p^-m^+V20$ , **C** –  $13136p^-m^+V5$ .

Validation of chemometric models.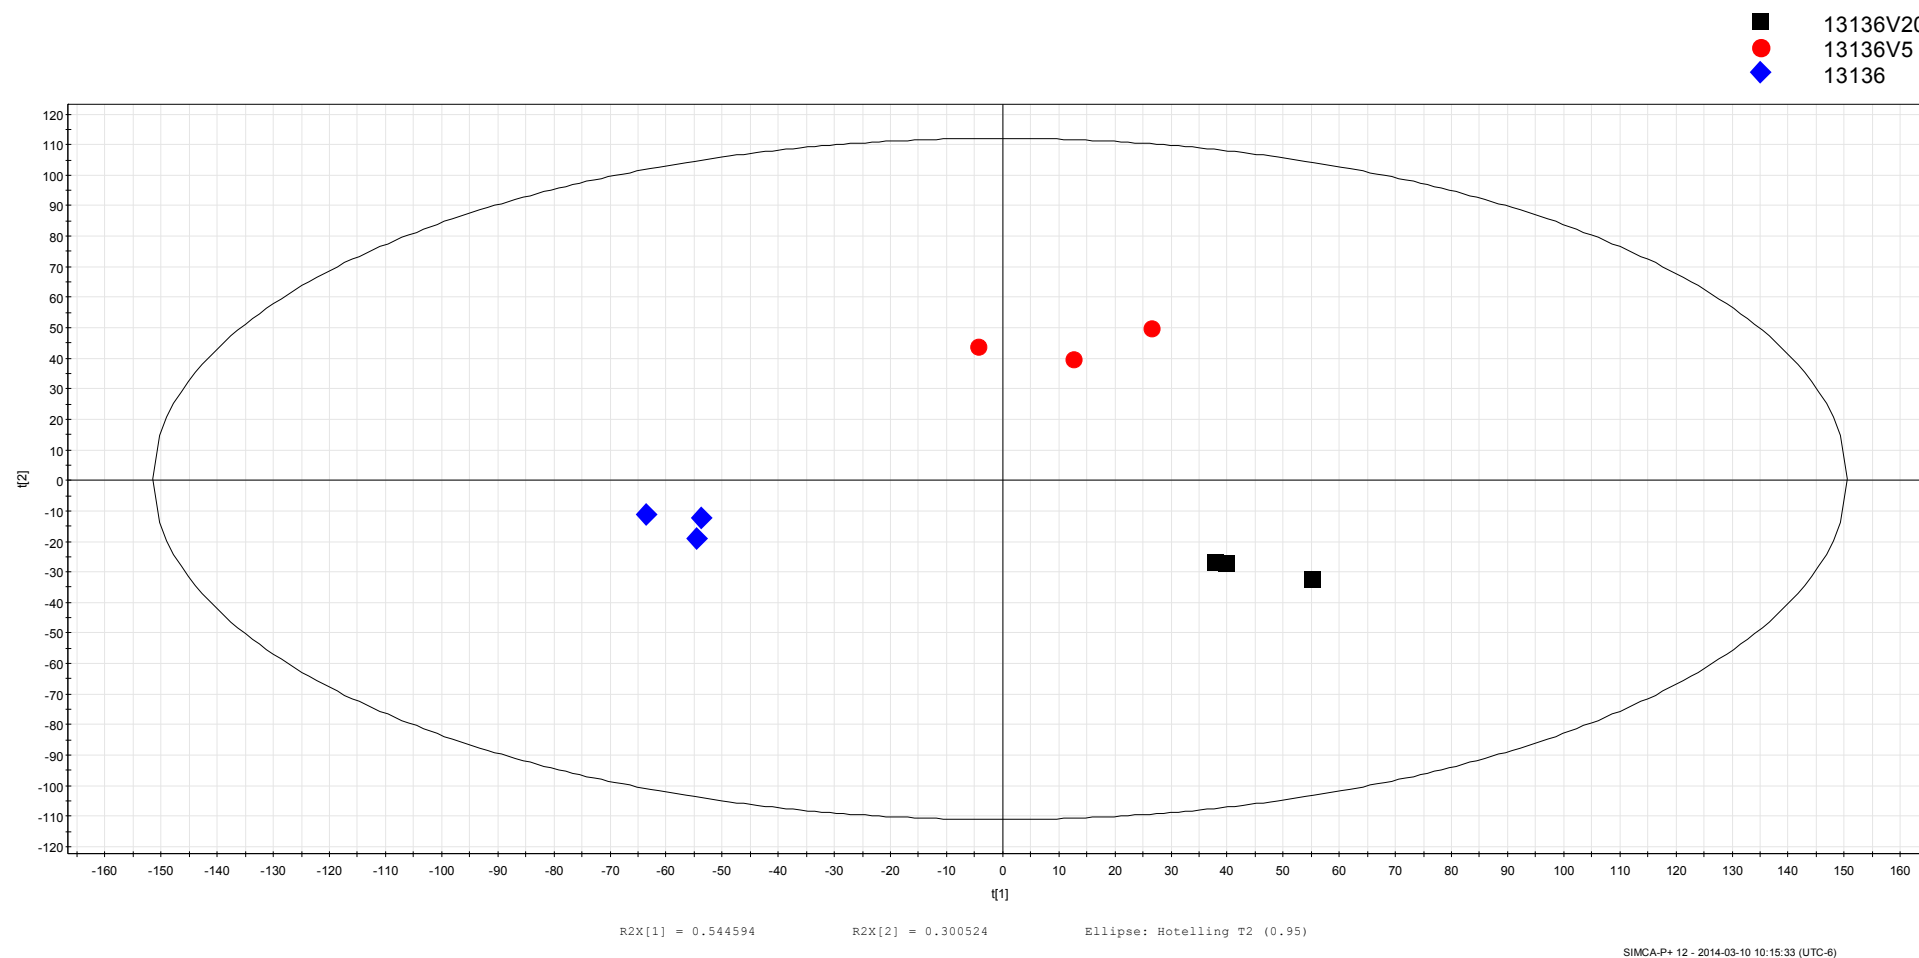

**Figure 2.** PCA scores plot separating *Staphylococcus aureus* strains. The first component (54% of total variability) distinguished between parent and VISA strains while 13136p<sup>-</sup>m<sup>+</sup>V5 and 13136p<sup>-</sup>m<sup>+</sup>V20 strains were discriminated along the second component (30% of total variability).

As the number of observations used in chemometric models was much lower than the total number of variables (metabolites), it is possible that the good performance statistics observed in the chemometric models can be due to overfitting of data or chance correlation [2–4]. Therefore, the validity of each model must be evaluated. The PLS-DA model obtained with SIMCA P+ (v. 12.0) software was further analyzed using analysis of variance of sevenfold Cross-Validation predictive residual (CV-ANOVA) and permutation with 300 random reclassifications. Cross-Validation (CV) was used to determine the sufficient number of Principal Components (PCs) represented by the total amount of explained X variance (R2X), Y-variance (R2Y) and cross-validated predictive ability (Q2Y). The PLS-DA model had R2Y = 99.0%, Q2 = 95.9% and variables explained 91.0% (R2X) of total variation. Figure 3 demonstrates a permutation test results—the goodness of fit and predictive ability ( $R^2/Q^2$ ) of the model. Permutation test summary: A PLS-DA model robustness was assessed by a 300 random permutations ( $p < 0.05$ ) of class membership.

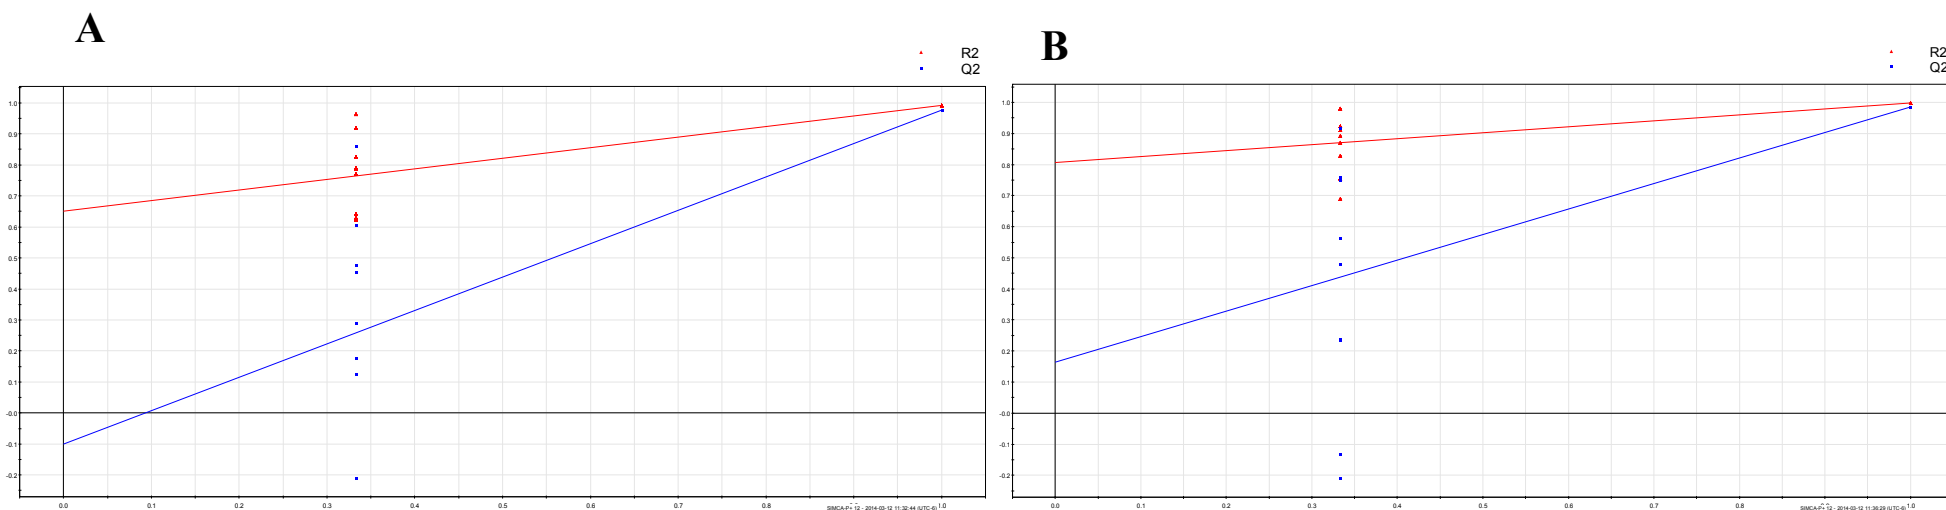

**Figure 3.** A permutation test of 3 strains (*13136p<sup>-</sup>m<sup>+</sup>V5*, *13136p<sup>-</sup>m<sup>+</sup>V20* and *13136p<sup>-</sup>m<sup>+</sup>*): A - *13136p<sup>-</sup>m<sup>+</sup>V5*, vs. *13136p<sup>-</sup>m<sup>+</sup>*; B - *13136p<sup>-</sup>m<sup>+</sup>V20* vs. *13136p<sup>-</sup>m<sup>+</sup>*. The vertical axis gives the R2 (red) and Q2 (blue) -values of the original model (far to the right) and the Y-permuted models further to the left. The horizontal axis shows the correlation between the permuted y-vectors and the original y-vector for the selected y.

The criteria for model validity are as follows. First, all the  $Q^2$  values on the permuted data set must be lower than the  $Q^2$  value on the actual data set. If this is not the case, it indicates that the model is capable of overfitting data. The regression line in validation plot (line joining the actual  $Q^2$  point to the centroid of the cluster of permuted  $Q^2$  values) must demonstrate a negative intercept on the y axis [5,6].

Evaluation of the discriminating metabolites toward the clustering in PLS-DA model was analyzed using regression coefficient plot with 95% jackknifed confident intervals where metabolites with Variable Importance for Projection (VIP) where scores exceeding 1.5 were selected as important and/or putative biomarkers [7] (Figure 4). VIP is a weighted sum of squares of the PLS loadings that takes into account the amount of explained Y-variance of each component.

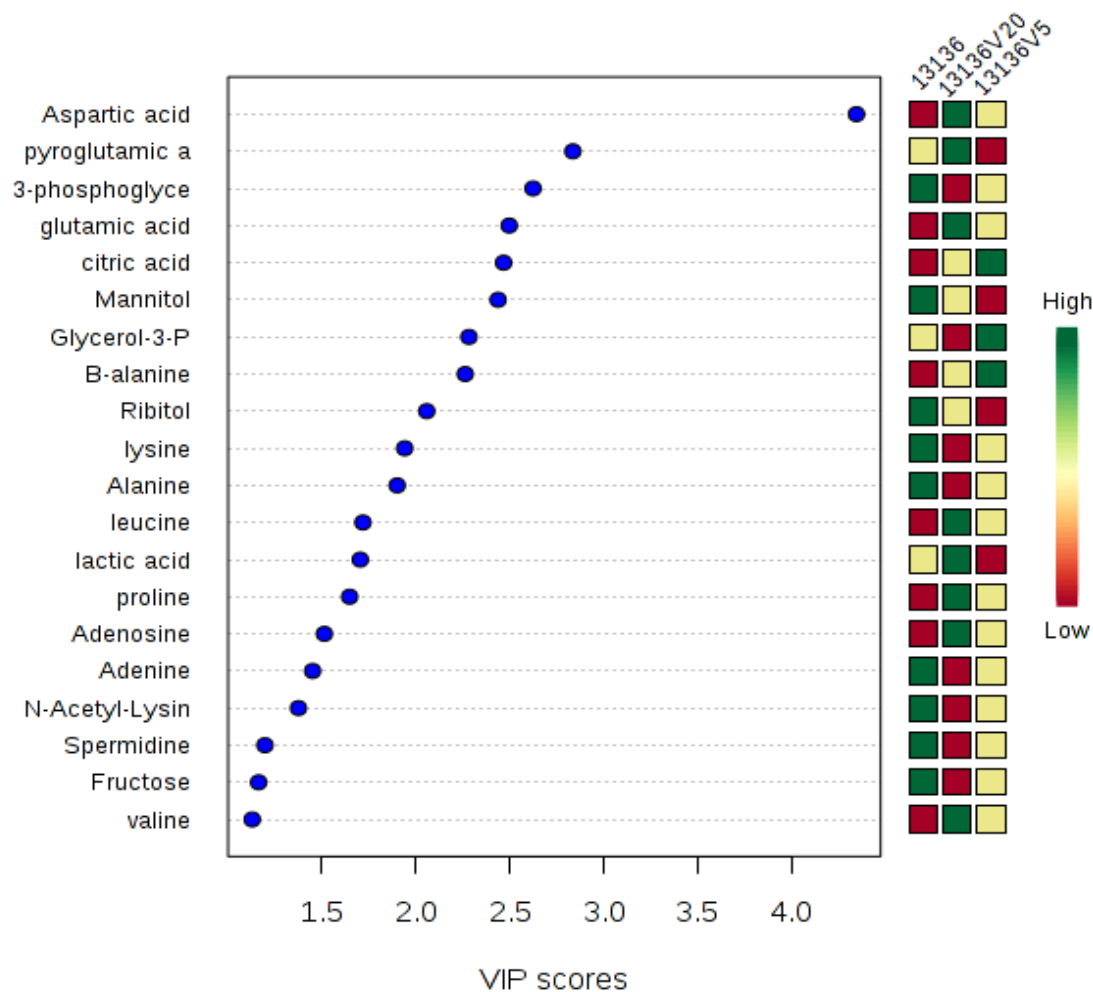

**Figure 4.** The top 20 compounds ranked by VIP scores in  $13136p^{-}m^{+}V5$ ,  $13136p^{-}m^{+}V20$  and  $13136p^{-}m^{+}$  strains.



To determine if the group of “important metabolites” (VIP) could classify samples, a Random Forest analysis was performed. The metabolites had a 100% predictive accuracy (Table 1). Thus, the metabolites that are differentially expressed between the groups may represent potential biomarkers for strain discrimination.

**Table 1.** Results of Random Forest analysis for sample classification by metabolites identified as important by VIP scores.

|                                           | Members | Correct | 13136V20 | 13136V5  | 13136    |
|-------------------------------------------|---------|---------|----------|----------|----------|
| <i>13136p<sup>-</sup>m<sup>+</sup>V20</i> | 3       | 100%    | <b>3</b> | 0        | 0        |
| <i>13136p<sup>-</sup>m<sup>+</sup>V5</i>  | 3       | 100%    | 0        | <b>3</b> | 0        |
| <i>13136p<sup>-</sup>m<sup>+</sup></i>    | 3       | 100%    | 0        | 0        | <b>3</b> |
| Total                                     | 9       | 100%    | 3        | 3        | 3        |

## References for Supplementary File S1

1. Xia, J.; Wishart, D.S. Web-based inference of biological patterns, functions and pathways from metabolomic data using MetaboAnalyst. *Nat. Protoc.* **2011**, *6*, 743–760.
2. Westerhuis, J.A.; Hoefsloot, H.C.J.; Smit, S.; Vis, D.J.; Smilde, A.K.; van Velzen, E.J.J.; van Duijnhoven, J.P.M.; van Dorsten, F.A. Assessment of PLS-DA cross validation. *Metabolomics* **2008**, *4*, 81–89.
3. Smit, S.; van Breemen, M.J.; Hoefsloot, H.C.; Smilde, A.K.; Aerts, J.M.; de Koster, C.G. Assessing the statistical validity of proteomics based biomarkers. *Anal. Chim. Acta* **2007**, *592*, 210–217.
4. Trygg, J.; Holmes, E.; Lundstedt, T. Chemometrics in metabonomics. *J. Proteome Res.* **2007**, *6*, 469–479.
5. Mahadevan, S.; Shah, S.L.; Marrie, T.J.; Slupsky, C.M. Analysis of metabolomic data using support vector machines. *Anal. Chem.* **2008**, *80*, 7562–7570.
6. Chan, E.C.Y.; Pasikanti, K.K.; Nicholson, J.K. Global urinary metabolic profiling procedures using gas chromatography-mass spectrometry. *Nat. Protoc.* **2011**, *6*, 1483–1499.
7. Wiklund, S.; Johansson, E.; Sjöström, L.; Mellerowicz, E.J.; Edlund, U.; Shockcor J.P.; Gottfries J.; Moritz T.; Trygg J. Visualization of GC/TOF-MS-based metabolomics data for identification of biochemically interesting compounds using OPLS class models. *Anal. Chem.* **2008**, *80*, 115–122.
